# Supplementary material for: Biochemical Basis of E. coli Topoisomerase I Relaxation Activity Reduction by Nonenzymatic Lysine Acetylation
Source: MDPI journal article supplement (doi:10.3390/ijms19051439), 2018-05-11
Supplement: s1 [file s1]

## Supplementary Information

### Biochemical Basis of *E. coli* Topoisomerase I Relaxation Activity Reduction by Non-Enzymatic Lysine Acetylation

Qingxuan Zhou, Mario Gomez, Francisco Fernandez-Lima, Yuk-Ching Tse-Dinh\*

Biomolecular Sciences Institute, Florida International University, Miami FL 33199, USA  
Department of Chemistry and Biochemistry, Florida International University, Miami FL 33199, USA

\*Author to whom correspondence should be addressed. Email: [yukching.tsedinh@fiu.edu](mailto:yukching.tsedinh@fiu.edu)

**Table S1. List of Tryptic Peptides Identified by Mass Spectrometry.** (A) Acetylated topoisomerase I peptides; (B) Non-acetylated topoisomerase I peptides.

**Table S2. MaxQuant Raw Data Evidence Table.** (A) Acetylated topoisomerase I peptides. Table S2A shows the unmodified peptides and the corresponding acetylated peptides paired by color sets. Also included are the protein groups reported by MaxQuant showing the identification score and % sequence coverage. Topoisomerase I is highlighted in green for clarity purposes. Table S2A also shows peptides containing oxidized methionines. (B) Non-acetylated topoisomerase I peptides. Table S2B shows the unmodified peptides and no acetylated peptides. Also included are the protein groups reported by MaxQuant showing the identification score and % sequence coverage. Topoisomerase I is highlighted in green for clarity purposes. Table S2B also shows peptides containing oxidized methionines.
