# Supplementary material for: Biochemical Basis of E. coli Topoisomerase I Relaxation Activity Reduction by Nonenzymatic Lysine Acetylation
Source: Int J Mol Sci. 2018 May 11;19(5):1439. doi: 10.3390/ijms19051439 (PMC5983628; doi:10.3390/ijms19051439)
Supplement: Supplementary file 1 [file ijms-19-01439-s001.zip › Table S1.xlsx]

## Sheet: S1A. Aceytlated Topo I
Mass	Start position	Sequence	End position
1224.74	4	ALVIVESPAKAK	15
1266.75	4	ALVIVESPAK(Ac)AK	15
1697.94	14	AKTINKYLGSDYVVK	28
1498.8	16	TINKYLGSDYVVK	28
754.409	29	SSVGHIR	35
1681.87	29	SSVGHIRDLPTSGSAAK	45
1809.97	29	SSVGHIRDLPTSGSAAK(Ac)K	46
1851.98	29	SSVGHIRDLPTSGSAAK(Ac)K	46
1073.57	36	DLPTSGSAAKK	46
923.456	46	KSADSTSTK	54
1223.64	46	KSADSTSTKTAK	57
2521.18	71	MGVDPWHNWEAHYEVLPGKEK	91
1242.72	92	VVSELKQLAEK	102
1354.72	134	YSRVVFNEITK	144
948.528	137	VVFNEITK	144
1402.79	137	VVFNEITKNAIR	148
1500.77	149	QAFNKPGELNIDR	161
2268.17	149	QAFNKPGELNIDRVNAQQAR	168
1390.77	174	VVGYMVSPLLWK	185
1518.86	174	VVGYMVSPLLWKK	186
757.445	196	VQSVAVR	202
1315.7	252	EQTQAAVSLLEK	263
1542.84	252	EQTQAAVSLLEKAR	265
2631.35	272	EDKPTTSKPGAPFITSTLQQAASTR	296
747.464	297	LGFGVKK	303
867.376	304	TMMMAQR	310
1378.66	311	LYEAGYITYMR	321
1649.77	322	TDSTNLSQDAVNMVR	336
999.466	337	GYISDNFGK	345
1523.76	346	KYLPESPNQYASK	358
1565.77	346	K(Ac)YLPESPNQYASK	358
1395.67	347	YLPESPNQYASK	358
990.565	390	LYQLIWR	396
2252.16	390	LYQLIWRQFVACQMTPAK	407
1279.61	397	QFVACQMTPAK	407
1501.7	408	YDSTTLTVGAGDFR	421
2261.22	456	GDALTLVELTPAQHFTKPPAR	476
1378.73	477	FSEASLVKELEK	488
1534.84	477	FSEASLVKELEKR	489
1576.85	477	FSEASLVKELEK(Ac)R	489
1934.02	490	GIGRPSTYASIISTIQDR	507
2110.05	610	TASTGVFLGCSGYALPPKER	629
1469.65	665	CGTAMDSYLIDPK	677
1625.75	665	CGTAMDSYLIDPKR	678
1753.85	665	CGTAMDSYLIDPKRK	679
2623.14	679	KLHVCGNNPTCDGYEIEEGEFR	700
2495.05	680	LHVCGNNPTCDGYEIEEGEFR	700
2736.23	680	LHVCGNNPTCDGYEIEEGEFRIK	702
1506.74	701	IKGYDGPIVECEK	713
2449.14	701	IKGYDGPIVECEKCGSEMHLK	721
1265.56	703	GYDGPIVECEK	713
2207.97	703	GYDGPIVECEKCGSEMHLK	721
2007.86	725	FGKYMACTNEECKNTR	740
1675.68	728	YMACTNEECKNTR	740
1803.77	728	YMACTNEECKNTRK	741
1477.76	774	DGAAGVFLAANTFPK	788
1717.91	789	SRETRAPLVEELYR	802
1474.78	791	ETRAPLVEELYR	802
1059.58	803	FRDRLPEK	810
1025.6	805	DRLPEKLR	812
1544.71	813	YLADAPQQDPEGNK	826
2031.97	813	YLADAPQQDPEGNKTMVR	830
1267.6	837	QQYVSSEKDGK	847
2028.01	848	ATGWSAFYVDGKWVEGKK	865

## Sheet: Table S1B. Non-acetyl. Topo I 
Mass	Start position	Sequence	End position
1697.94	14	AKTINKYLGSDYVVK	28
1681.87	29	SSVGHIRDLPTSGSAAK	45
1809.97	29	SSVGHIRDLPTSGSAAKK	46
2521.18	71	MGVDPWHNWEAHYEVLPGKEK	91
1242.72	92	VVSELKQLAEK	102
948.528	137	VVFNEITK	144
1500.77	149	QAFNKPGELNIDR	161
2268.17	149	QAFNKPGELNIDRVNAQQAR	168
1390.77	174	VVGYMVSPLLWK	185
1518.86	174	VVGYMVSPLLWKK	186
1315.7	252	EQTQAAVSLLEK	263
2631.35	272	EDKPTTSKPGAPFITSTLQQAASTR	296
1649.77	322	TDSTNLSQDAVNMVR	336
999.466	337	GYISDNFGK	345
1523.76	346	KYLPESPNQYASK	358
1395.67	347	YLPESPNQYASK	358
1279.61	397	QFVACQMTPAK	407
1501.7	408	YDSTTLTVGAGDFR	421
813.489	437	VMPALRK	443
1534.84	477	FSEASLVKELEKR	489
1934.02	490	GIGRPSTYASIISTIQDR	507
2110.05	610	TASTGVFLGCSGYALPPKER	629
1469.65	665	CGTAMDSYLIDPK	677
1625.75	665	CGTAMDSYLIDPKR	678
1753.85	665	CGTAMDSYLIDPKRK	679
1506.74	701	IKGYDGPIVECEK	713
1265.56	703	GYDGPIVECEK	713
1675.68	728	YMACTNEECKNTR	740
1477.76	774	DGAAGVFLAANTFPK	788
1474.78	791	ETRAPLVEELYR	802
1544.71	813	YLADAPQQDPEGNK	826
2031.97	813	YLADAPQQDPEGNKTMVR	830
1267.6	837	QQYVSSEKDGK	847
2028.01	848	ATGWSAFYVDGKWVEGKK	865
