# Supplementary material for: Biochemical Basis of E. coli Topoisomerase I Relaxation Activity Reduction by Nonenzymatic Lysine Acetylation
Source: Int J Mol Sci. 2018 May 11;19(5):1439. doi: 10.3390/ijms19051439 (PMC5983628; doi:10.3390/ijms19051439)
Supplement: Supplementary file 1 [file ijms-19-01439-s001.zip › Table S2.xlsx]

## Sheet: S2A - Ac Topo I Evidence
Table S2. MaxQuant Raw Data Evidence Table. (A) Acetylated topoisomerase I peptides. Table S2A shows the unmodified peptides and the corresponding acetylated peptides paired by color sets. Also included are the protein groups reported by MaxQuant showing the identification score and % sequence coverage. Topoisomerase is highlighted in green for clarity purposes. Table S2A also shows peptides cont…
Sequence	Length	Modifications	Modified sequence	Acetyl (K) Probabilities	Oxidation (M) Probabilities	Acetyl (K) Score Diffs	Oxidation (M) Score Diffs	Acetyl (K)	Acetyl (Protein N-term)	Oxidation (M)	Missed cleavages	Proteins	Leading proteins	Leading razor protein	Type	Raw file	MS/MS m/z	Charge	m/z	Mass	Resolution	Uncalibrated - Calibrated m/z [ppm]	Uncalibrated - Calibrated m/z [Da]	Mass error [ppm]	Mass error [Da]	Uncalibrated mass error [ppm]	Uncalibrated mass error [Da]	Max intensity m/z 0	Retention time	Retention length	Calibrated retention time	Calibrated retention time start	Calibrated retention time finish	Retention time calibration	Match time difference	Match m/z difference	Match q-value	Match score	Number of data points	Number of scans	Number of isotopic peaks	PIF	Fraction of total spectrum	Base peak fraction	PEP	MS/MS count	MS/MS scan number	Score	Delta score
KSADSTSTK	9	Unmodified	_KSADSTSTK_					0	0	0	1	sp|P06612|TOP1_ECOLI	sp|P06612|TOP1_ECOLI	sp|P06612|TOP1_ECOLI	MULTI-MSMS	Ac-Topo (MSMS_500 thold)_1-45_01_2665	462.739	2	462.735	923.456	NaN	3.5813	0.0016572	-0.96785	-0.00044786	2.6134	0.0012093	462.735	7.3392	0.54433	7.3392	7.2547	7.799	8.8818e-16					17	9	2	0	0	0	0.037387	1	2666	5.7813	4.5076
FSEASLVKELEKR	13	Unmodified	_FSEASLVKELEKR_					0	0	0	2	sp|P06612|TOP1_ECOLI	sp|P06612|TOP1_ECOLI	sp|P06612|TOP1_ECOLI	MSMS	Ac-Topo (MSMS_500 thold)_1-45_01_2665	512.621	3	512.619	1534.84	NaN	NaN	NaN	NaN	NaN	NaN	NaN	NaN	28.013	1	28.013	27.513	28.513	0								0	0	0	0.00075428	1	6173	49.929	44.931
DRLPEKLR	8	Unmodified	_DRLPEKLR_					0	0	0	2	sp|P06612|TOP1_ECOLI	sp|P06612|TOP1_ECOLI	sp|P06612|TOP1_ECOLI	MULTI-MSMS	Ac-Topo (MSMS_500 thold)_1-45_01_2665	513.808	2	513.806	1025.6	NaN	2.9198	0.0015002	0.71028	0.00036494	3.6301	0.0018652	513.807	19.347	0.39038	19.347	19.187	19.577	0					42	25	2	0	0	0	4.6516e-08	8	4904	66.692	66.692
FRDRLPEK	8	Unmodified	_FRDRLPEK_					0	0	0	2	sp|P06612|TOP1_ECOLI	sp|P06612|TOP1_ECOLI	sp|P06612|TOP1_ECOLI	MULTI-MSMS	Ac-Topo (MSMS_500 thold)_1-45_01_2665	531.301	2	530.799	1059.58	NaN	3.0076	0.0015964	-6.7214	-0.0035677	-3.7138	-0.0019713	530.792	18.905	0.060792	18.905	18.877	18.937	0					8	5	2	0	0	0	0.027726	1	4817	17.386	6.918
DLPTSGSAAKK	11	Unmodified	_DLPTSGSAAKK_					0	0	0	1	sp|P06612|TOP1_ECOLI	sp|P06612|TOP1_ECOLI	sp|P06612|TOP1_ECOLI	MULTI-MSMS	Ac-Topo (MSMS_500 thold)_1-45_01_2665	538.295	2	537.793	1073.57	NaN	3.0434	0.0016367	-2.092	-0.0011251	0.95138	0.00051165	537.792	10.635	0.49142	10.635	10.46	10.951	0					43	18	4	0	0	0	4.5388e-05	5	3173	54.416	44.711
YMACTNEECKNTRK	14	Unmodified	_YMACTNEECKNTRK_					0	0	0	2	sp|P06612|TOP1_ECOLI	sp|P06612|TOP1_ECOLI	sp|P06612|TOP1_ECOLI	MSMS	Ac-Topo (MSMS_500 thold)_1-45_01_2665	602.594	3	602.264	1803.77	NaN	NaN	NaN	NaN	NaN	NaN	NaN	NaN	9.041	1	9.041	8.541	9.541	0								0	0	0	0.030179	1	2884	39.424	35.584
SSVGHIRDLPTSGSAAKK	18	Unmodified	_SSVGHIRDLPTSGSAAKK_					0	0	0	2	sp|P06612|TOP1_ECOLI	sp|P06612|TOP1_ECOLI	sp|P06612|TOP1_ECOLI	MULTI-MSMS	Ac-Topo (MSMS_500 thold)_1-45_01_2665	604.333	3	604.331	1809.97	NaN	1.9441	0.0011749	-0.0015928	-9.6258e-07	1.9425	0.0011739	604.331	20.401	0.60303	20.401	20.222	20.825	0					80	33	4	0	0	0	3.2347e-09	6	5113	69.94	62.231
KSADSTSTKTAK	12	Unmodified	_KSADSTSTKTAK_					0	0	0	2	sp|P06612|TOP1_ECOLI	sp|P06612|TOP1_ECOLI	sp|P06612|TOP1_ECOLI	MSMS	Ac-Topo (MSMS_500 thold)_1-45_01_2665	612.818	2	612.825	1223.64	NaN	NaN	NaN	NaN	NaN	NaN	NaN	NaN	7.1987	1	7.1987	6.6987	7.6987	0								0	0	0	0.037394	1	2643	11.714	7.3772
ALVIVESPAKAK	12	Unmodified	_ALVIVESPAKAK_					0	0	0	1	sp|P06612|TOP1_ECOLI	sp|P06612|TOP1_ECOLI	sp|P06612|TOP1_ECOLI	MULTI-MSMS	Ac-Topo (MSMS_500 thold)_1-45_01_2665	613.378	2	613.379	1224.74	NaN	0.89125	0.00054667	-0.13321	-8.171e-05	0.75804	0.00046496	613.379	24.743	0.86869	24.743	24.309	25.178	0					34	13	4	0	0	0	1.6973e-61	4	5738	166.07	158.79
VVSELKQLAEK	11	Unmodified	_VVSELKQLAEK_					0	0	0	1	sp|P06612|TOP1_ECOLI	sp|P06612|TOP1_ECOLI	sp|P06612|TOP1_ECOLI	MULTI-MSMS	Ac-Topo (MSMS_500 thold)_1-45_01_2665	622.372	2	622.366	1242.72	NaN	2.3817	0.0014823	-0.28539	-0.00017762	2.0963	0.0013047	622.366	24.279	0.75224	24.279	24.149	24.902	0					17	10	2	0	0	0	8.3899e-13	2	5696	90.15	80.793
GYDGPIVECEK	11	Unmodified	_GYDGPIVECEK_					0	0	0	0	sp|P06612|TOP1_ECOLI	sp|P06612|TOP1_ECOLI	sp|P06612|TOP1_ECOLI	MULTI-MSMS	Ac-Topo (MSMS_500 thold)_1-45_01_2665	633.791	2	633.787	1265.56	NaN	2.3952	0.001518	3.856	0.0024439	6.2512	0.0039619	633.789	22.8	0.50196	22.8	22.509	23.011	0					19	7	4	0	0	0	2.1503e-12	2	5491	80.688	75.723
ALVIVESPAKAK	12	Acetyl (K)	_ALVIVESPAK(ac)AK_	ALVIVESPAK(1)AK		ALVIVESPAK(75.29)AK(-75.29)		1	0	0	1	sp|P06612|TOP1_ECOLI	sp|P06612|TOP1_ECOLI	sp|P06612|TOP1_ECOLI	MULTI-MSMS	Ac-Topo (MSMS_500 thold)_1-45_01_2665	634.383	2	634.385	1266.75	NaN	2.4649	0.0015637	-3.4755	-0.0022048	-1.0105	-0.00064107	634.381	26.591	0.31733	26.591	26.388	26.705	0					17	7	3	0	0	0	1.2484e-08	4	5986	75.294	74.604
QQYVSSEKDGK	11	Unmodified	_QQYVSSEKDGK_					0	0	0	1	sp|P06612|TOP1_ECOLI	sp|P06612|TOP1_ECOLI	sp|P06612|TOP1_ECOLI	MULTI-MSMS	Ac-Topo (MSMS_500 thold)_1-45_01_2665	634.808	2	634.809	1267.6	NaN	2.6555	0.0016858	1.7961	0.0011402	4.4516	0.0028259	634.808	8.8462	0.57238	8.8462	8.5835	9.1559	0					18	10	3	0	0	0	4.1308e-13	1	2861	92.051	74.155
QFVACQMTPAK	11	Unmodified	_QFVACQMTPAK_					0	0	0	0	sp|P06612|TOP1_ECOLI	sp|P06612|TOP1_ECOLI	sp|P06612|TOP1_ECOLI	MULTI-MSMS	Ac-Topo (MSMS_500 thold)_1-45_01_2665	640.813	2	640.81	1279.61	NaN	2.4268	0.0015551	1.572	0.0010074	3.9988	0.0025625	640.812	23.377	0.42422	23.377	23.098	23.523	0					24	8	4	0	0	0	4.0655e-08	3	5562	72.607	72.607
QFVACQMTPAK	11	Oxidation (M)	_QFVACQM(ox)TPAK_		QFVACQM(1)TPAK		QFVACQM(48.09)TPAK	0	0	1	0	sp|P06612|TOP1_ECOLI	sp|P06612|TOP1_ECOLI	sp|P06612|TOP1_ECOLI	MSMS	Ac-Topo (MSMS_500 thold)_1-45_01_2665	648.81	2	648.807	1295.6	NaN	NaN	NaN	NaN	NaN	NaN	NaN	NaN	19.767	1	19.767	19.267	20.267	0								0	0	0	0.020633	1	4980	48.091	46.15
EQTQAAVSLLEK	12	Unmodified	_EQTQAAVSLLEK_					0	0	0	0	sp|P06612|TOP1_ECOLI	sp|P06612|TOP1_ECOLI	sp|P06612|TOP1_ECOLI	MULTI-MSMS	Ac-Topo (MSMS_500 thold)_1-45_01_2665	658.856	2	658.856	1315.7	NaN	1.9852	0.001308	-1.5263	-0.0010056	0.45893	0.00030237	658.855	26.345	0.61496	26.345	25.975	26.59	0					12	7	3	0	0	0	7.4678e-27	2	5956	115.78	105.07
FGKYMACTNEECKNTR	16	Unmodified	_FGKYMACTNEECKNTR_					0	0	0	2	sp|P06612|TOP1_ECOLI	sp|P06612|TOP1_ECOLI	sp|P06612|TOP1_ECOLI	MULTI-MSMS	Ac-Topo (MSMS_500 thold)_1-45_01_2665	670.3	3	670.294	2007.86	NaN	2.5982	0.0017416	-5.7428	-0.0038494	-3.1446	-0.0021078	670.291	20.31	0.41771	20.31	20.189	20.607	0					23	12	4	0	0	0	0.0072305	1	5095	25.365	25.365
ATGWSAFYVDGKWVEGKK	18	Unmodified	_ATGWSAFYVDGKWVEGKK_					0	0	0	2	sp|P06612|TOP1_ECOLI	sp|P06612|TOP1_ECOLI	sp|P06612|TOP1_ECOLI	MSMS	Ac-Topo (MSMS_500 thold)_1-45_01_2665	677.013	3	677.011	2028.01	NaN	NaN	NaN	NaN	NaN	NaN	NaN	NaN	28.924	1	28.924	28.424	29.424	0								0	0	0	2.3999e-13	1	6296	105.39	84.636
YLADAPQQDPEGNKTMVR	18	Unmodified	_YLADAPQQDPEGNKTMVR_					0	0	0	1	sp|P06612|TOP1_ECOLI	sp|P06612|TOP1_ECOLI	sp|P06612|TOP1_ECOLI	MULTI-MSMS	Ac-Topo (MSMS_500 thold)_1-45_01_2665	678.666	3	678.33	2031.97	NaN	1.8244	0.0012375	-0.43044	-0.00029198	1.3939	0.00094555	678.664	21.958	0.37408	21.958	21.749	22.124	0					18	8	3	0	0	0	1.6143e-14	3	5375	93.495	83.937
YSRVVFNEITK	11	Unmodified	_YSRVVFNEITK_					0	0	0	1	sp|P06612|TOP1_ECOLI	sp|P06612|TOP1_ECOLI	sp|P06612|TOP1_ECOLI	MULTI-MSMS	Ac-Topo (MSMS_500 thold)_1-45_01_2665	678.361	2	678.37	1354.72	NaN	2.4521	0.0016634	-0.45046	-0.00030558	2.0016	0.0013578	678.369	25.521	0.45049	25.521	25.31	25.761	0					14	10	2	0	0	0	0.00033332	2	5846	43.282	36.222
YLADAPQQDPEGNKTMVR	18	Oxidation (M)	_YLADAPQQDPEGNKTM(ox)VR_		YLADAPQQDPEGNKTM(1)VR		YLADAPQQDPEGNKTM(98.06)VR	0	0	1	1	sp|P06612|TOP1_ECOLI	sp|P06612|TOP1_ECOLI	sp|P06612|TOP1_ECOLI	MULTI-MSMS	Ac-Topo (MSMS_500 thold)_1-45_01_2665	683.663	3	683.662	2047.96	NaN	1.5313	0.0010469	-0.42691	-0.00029186	1.1044	0.00075504	683.662	20.401	0.40713	20.401	20.243	20.65	0					17	11	2	0	0	0	3.295e-20	2	5111	98.062	92.702
FSEASLVKELEK	12	Unmodified	_FSEASLVKELEK_					0	0	0	1	sp|P06612|TOP1_ECOLI	sp|P06612|TOP1_ECOLI	sp|P06612|TOP1_ECOLI	MULTI-MSMS	Ac-Topo (MSMS_500 thold)_1-45_01_2665	690.376	2	690.374	1378.73	NaN	2.0224	0.0013962	1.7107	0.001181	3.733	0.0025772	690.376	28.581	0.79979	28.581	27.923	28.723	0					13	9	2	0	0	0	4.1285e-27	1	6244	123.01	108.31
LYEAGYITYMR	11	Oxidation (M)	_LYEAGYITYM(ox)R_		LYEAGYITYM(1)R		LYEAGYITYM(52.58)R	0	0	1	0	sp|P06612|TOP1_ECOLI	sp|P06612|TOP1_ECOLI	sp|P06612|TOP1_ECOLI	MULTI-MSMS	Ac-Topo (MSMS_500 thold)_1-45_01_2665	698.337	2	698.334	1394.65	NaN	2.4448	0.0017073	-4.2244	-0.00295	-1.7795	-0.0012427	698.333	25.798	0.37535	25.798	25.6	25.975	0					13	5	3	0	0	0	7.0808e-05	1	5889	52.579	22.015
YLPESPNQYASK	12	Unmodified	_YLPESPNQYASK_					0	0	0	0	sp|P06612|TOP1_ECOLI	sp|P06612|TOP1_ECOLI	sp|P06612|TOP1_ECOLI	MULTI-MSMS	Ac-Topo (MSMS_500 thold)_1-45_01_2665	698.838	2	698.841	1395.67	NaN	1.938	0.0013543	-0.46728	-0.00032656	1.4707	0.0010278	698.84	22.321	0.67981	22.321	22.001	22.68	0					50	18	4	0	0	0	3.5048e-20	9	5422	110.38	96.612
VVFNEITKNAIR	12	Unmodified	_VVFNEITKNAIR_					0	0	0	1	sp|P06612|TOP1_ECOLI	sp|P06612|TOP1_ECOLI	sp|P06612|TOP1_ECOLI	MULTI-MSMS	Ac-Topo (MSMS_500 thold)_1-45_01_2665	702.405	2	702.404	1402.79	NaN	1.2931	0.00090826	0.70884	0.0004979	2.0019	0.0014062	702.404	26.431	0.64588	26.431	26.104	26.749	0					37	11	5	0	0	0	2.5406e-48	3	5967	154.84	154.84
VVGYMVSPLLWK	12	Oxidation (M)	_VVGYM(ox)VSPLLWK_		VVGYM(1)VSPLLWK		VVGYM(74.16)VSPLLWK	0	0	1	0	sp|P06612|TOP1_ECOLI	sp|P06612|TOP1_ECOLI	sp|P06612|TOP1_ECOLI	MULTI-MSMS	Ac-Topo (MSMS_500 thold)_1-45_01_2665	704.893	2	704.389	1406.76	NaN	2.118	0.0014919	0.33615	0.00023678	2.4541	0.0017287	704.389	31.747	0.30063	31.747	31.578	31.879	0					14	7	2	0	0	0	1.0525e-08	5	6675	74.162	63.188
CGTAMDSYLIDPK	13	Unmodified	_CGTAMDSYLIDPK_					0	0	0	0	sp|P06612|TOP1_ECOLI	sp|P06612|TOP1_ECOLI	sp|P06612|TOP1_ECOLI	MSMS	Ac-Topo (MSMS_500 thold)_1-45_01_2665	735.832	2	735.834	1469.65	NaN	NaN	NaN	NaN	NaN	NaN	NaN	NaN	27.79	1	27.79	27.29	28.29	0								0	0	0	1.7641e-06	1	6145	76.533	72.235
CGTAMDSYLIDPK	13	Unmodified	_CGTAMDSYLIDPK_					0	0	0	0	sp|P06612|TOP1_ECOLI	sp|P06612|TOP1_ECOLI	sp|P06612|TOP1_ECOLI	MSMS	Ac-Topo (MSMS_500 thold)_1-45_01_2665	735.835	2	735.834	1469.65	NaN	NaN	NaN	NaN	NaN	NaN	NaN	NaN	27.885	1	27.885	27.385	28.385	0								0	0	0	7.9503e-17	1	6157	120.06	120.06
GYDGPIVECEKCGSEMHLK	19	Unmodified	_GYDGPIVECEKCGSEMHLK_					0	0	0	1	sp|P06612|TOP1_ECOLI	sp|P06612|TOP1_ECOLI	sp|P06612|TOP1_ECOLI	MULTI-MSMS	Ac-Topo (MSMS_500 thold)_1-45_01_2665	736.995	3	736.996	2207.96	NaN	2.343	0.0017268	-4.9555	-0.0036522	-2.6125	-0.0019254	736.993	24.365	0.42802	24.365	24.149	24.577	0					11	6	2	0	0	0	0.014937	1	5697	15.345	11.247
ETRAPLVEELYR	12	Unmodified	_ETRAPLVEELYR_					0	0	0	1	sp|P06612|TOP1_ECOLI	sp|P06612|TOP1_ECOLI	sp|P06612|TOP1_ECOLI	MSMS	Ac-Topo (MSMS_500 thold)_1-45_01_2665	738.397	2	738.396	1474.78	NaN	NaN	NaN	NaN	NaN	NaN	NaN	NaN	28.277	1	28.277	27.777	28.777	0								0	0	0	1.194e-16	1	6206	110.08	91.809
DGAAGVFLAANTFPK	15	Unmodified	_DGAAGVFLAANTFPK_					0	0	0	0	sp|P06612|TOP1_ECOLI	sp|P06612|TOP1_ECOLI	sp|P06612|TOP1_ECOLI	MULTI-MSMS	Ac-Topo (MSMS_500 thold)_1-45_01_2665	739.886	2	739.886	1477.76	NaN	1.1629	0.00086038	-0.84765	-0.00062716	0.31521	0.00023322	739.884	30.216	1.1945	30.216	29.585	30.779	0					25	16	3	0	0	0	1.8178e-37	3	6461	133.07	117.87
GYDGPIVECEKCGSEMHLK	19	Oxidation (M)	_GYDGPIVECEKCGSEM(ox)HLK_		GYDGPIVECEKCGSEM(1)HLK		GYDGPIVECEKCGSEM(30.11)HLK	0	0	1	1	sp|P06612|TOP1_ECOLI	sp|P06612|TOP1_ECOLI	sp|P06612|TOP1_ECOLI	MULTI-MSMS	Ac-Topo (MSMS_500 thold)_1-45_01_2665	742.662	3	742.327	2223.96	NaN	2.4239	0.0017993	1.9427	0.0014421	4.3666	0.0032414	742.663	22.543	0.38278	22.543	22.38	22.763	0					21	8	4	0	0	0	0.0087551	1	5450	30.107	27.924
CGTAMDSYLIDPK	13	Oxidation (M)	_CGTAM(ox)DSYLIDPK_		CGTAM(1)DSYLIDPK		CGTAM(123.01)DSYLIDPK	0	0	1	0	sp|P06612|TOP1_ECOLI	sp|P06612|TOP1_ECOLI	sp|P06612|TOP1_ECOLI	MULTI-MSMS	Ac-Topo (MSMS_500 thold)_1-45_01_2665	743.833	2	743.831	1485.65	NaN	2.2038	0.0016393	-0.33404	-0.00024847	1.8698	0.0013908	743.83	25.136	0.53609	25.136	24.967	25.503	0					14	9	3	0	0	0	1.3911e-27	3	5799	123.01	91.018
LGFGVKK	7	Unmodified	_LGFGVKK_					0	0	0	1	sp|P06612|TOP1_ECOLI	sp|P06612|TOP1_ECOLI	sp|P06612|TOP1_ECOLI	MULTI-MSMS	Ac-Topo (MSMS_500 thold)_1-45_01_2665	748.469	1	748.472	747.464	NaN	2.5103	0.0018789	-4.4179	-0.0033067	-1.9076	-0.0014278	748.47	22.728	0.32279	22.728	22.509	22.832	0					6	4	2	0	0	0	0.00052681	2	5471	40.686	40.686
TINKYLGSDYVVK	13	Unmodified	_TINKYLGSDYVVK_					0	0	0	1	sp|P06612|TOP1_ECOLI	sp|P06612|TOP1_ECOLI	sp|P06612|TOP1_ECOLI	MULTI-MSMS	Ac-Topo (MSMS_500 thold)_1-45_01_2665	750.41	2	750.409	1498.8	NaN	1.008	0.00075638	0.97687	0.00073305	1.9848	0.0014894	750.409	25.238	0.63307	25.238	24.967	25.6	0					35	11	5	0	0	0	2.4547e-48	2	5812	152.47	145.2
QAFNKPGELNIDR	13	Unmodified	_QAFNKPGELNIDR_					0	0	0	1	sp|P06612|TOP1_ECOLI	sp|P06612|TOP1_ECOLI	sp|P06612|TOP1_ECOLI	MSMS	Ac-Topo (MSMS_500 thold)_1-45_01_2665	751.392	2	751.392	1500.77	NaN	NaN	NaN	NaN	NaN	NaN	NaN	NaN	23.831	1	23.831	23.331	24.331	0								0	0	0	0.0008845	1	5629	58.274	10.183
LYQLIWRQFVACQMTPAK	18	Unmodified	_LYQLIWRQFVACQMTPAK_					0	0	0	1	sp|P06612|TOP1_ECOLI	sp|P06612|TOP1_ECOLI	sp|P06612|TOP1_ECOLI	MULTI-MSMS	Ac-Topo (MSMS_500 thold)_1-45_01_2665	751.723	3	751.727	2252.16	NaN	2.0958	0.0015755	-3.1169	-0.0023431	-1.0211	-0.00076758	751.725	25.574	0.4229	25.574	25.416	25.839	0					14	9	2	0	0	0	0.020699	2	5857	5.71	1.1834
YDSTTLTVGAGDFR	14	Unmodified	_YDSTTLTVGAGDFR_					0	0	0	0	sp|P06612|TOP1_ECOLI	sp|P06612|TOP1_ECOLI	sp|P06612|TOP1_ECOLI	MULTI-MSMS	Ac-Topo (MSMS_500 thold)_1-45_01_2665	751.863	2	751.86	1501.7	NaN	2.1758	0.0016359	3.7516	0.0028207	5.9275	0.0044566	751.863	26.78	0.46732	26.78	26.518	26.986	0					21	10	4	0	0	0	3.958e-19	2	6017	98.156	87.57
IKGYDGPIVECEK	13	Unmodified	_IKGYDGPIVECEK_					0	0	0	1	sp|P06612|TOP1_ECOLI	sp|P06612|TOP1_ECOLI	sp|P06612|TOP1_ECOLI	MULTI-MSMS	Ac-Topo (MSMS_500 thold)_1-45_01_2665	754.38	2	754.377	1506.74	NaN	2.065	0.0015578	-0.94458	-0.00071257	1.1204	0.00084521	754.377	23.206	0.59269	23.206	22.832	23.425	0					26	10	4	0	0	0	1.4552e-12	2	5552	92.611	74.552
GDALTLVELTPAQHFTKPPAR	21	Unmodified	_GDALTLVELTPAQHFTKPPAR_					0	0	0	1	sp|P06612|TOP1_ECOLI	sp|P06612|TOP1_ECOLI	sp|P06612|TOP1_ECOLI	MSMS	Ac-Topo (MSMS_500 thold)_1-45_01_2665	754.743	3	754.746	2261.22	NaN	NaN	NaN	NaN	NaN	NaN	NaN	NaN	29.745	1	29.745	29.245	30.245	0								0	0	0	0.015662	1	6401	39.387	38.624
SSVGHIR	7	Unmodified	_SSVGHIR_					0	0	0	0	sp|P06612|TOP1_ECOLI	sp|P06612|TOP1_ECOLI	sp|P06612|TOP1_ECOLI	MULTI-MSMS	Ac-Topo (MSMS_500 thold)_1-45_01_2665	755.415	1	755.416	754.409	NaN	2.6906	0.0020325	-0.90334	-0.0006824	1.7873	0.0013501	755.415	9.9293	0.41288	9.9293	9.7526	10.166	-1.7764e-15					24	17	2	0	0	0	0.028881	4	3023	10.306	10.306
QAFNKPGELNIDRVNAQQAR	20	Unmodified	_QAFNKPGELNIDRVNAQQAR_					0	0	0	2	sp|P06612|TOP1_ECOLI	sp|P06612|TOP1_ECOLI	sp|P06612|TOP1_ECOLI	MULTI-MSMS	Ac-Topo (MSMS_500 thold)_1-45_01_2665	757.068	3	757.065	2268.17	NaN	2.4641	0.0018655	-2.1465	-0.001625	0.31766	0.00024049	757.397	23.35	0.30618	23.35	23.216	23.523	0					9	6	2	0	0	0	0.036062	1	5565	3.1438	0
QAFNKPGELNIDRVNAQQAR	20	Unmodified	_QAFNKPGELNIDRVNAQQAR_					0	0	0	2	sp|P06612|TOP1_ECOLI	sp|P06612|TOP1_ECOLI	sp|P06612|TOP1_ECOLI	MULTI-MSMS	Ac-Topo (MSMS_500 thold)_1-45_01_2665	757.403	3	757.065	2268.17	NaN	1.4595	0.0011049	0.67992	0.00051475	2.1394	0.0016197	757.398	23.74	0.84122	23.74	23.582	24.423	3.5527e-15					36	14	5	0	0	0	9.8703e-10	3	5628	72.184	63.282
VQSVAVR	7	Unmodified	_VQSVAVR_					0	0	0	0	sp|P06612|TOP1_ECOLI	sp|P06612|TOP1_ECOLI	sp|P06612|TOP1_ECOLI	MULTI-MSMS	Ac-Topo (MSMS_500 thold)_1-45_01_2665	759.469	1	758.452	757.445	NaN	2.5026	0.0018981	-0.66759	-0.00050633	1.835	0.0013918	758.451	12.769	0.3247	12.769	12.567	12.892	-1.7764e-15					30	20	2	0	0	0	8.3657e-06	12	3571	56.091	56.091
VVGYMVSPLLWKK	13	Unmodified	_VVGYMVSPLLWKK_					0	0	0	1	sp|P06612|TOP1_ECOLI	sp|P06612|TOP1_ECOLI	sp|P06612|TOP1_ECOLI	MULTI-MSMS	Ac-Topo (MSMS_500 thold)_1-45_01_2665	760.443	2	760.439	1518.86	NaN	2.1293	0.0016192	1.224	0.00093081	3.3533	0.00255	760.94	31.67	0.3391	31.67	31.491	31.83	0					20	9	3	0	0	0	2.8228e-05	5	6671	53.124	51.927
KYLPESPNQYASK	13	Unmodified	_KYLPESPNQYASK_					0	0	0	1	sp|P06612|TOP1_ECOLI	sp|P06612|TOP1_ECOLI	sp|P06612|TOP1_ECOLI	MULTI-MSMS	Ac-Topo (MSMS_500 thold)_1-45_01_2665	762.893	2	762.888	1523.76	NaN	2.1427	0.0016346	-0.79489	-0.00060641	1.3478	0.0010282	762.888	21.515	0.27788	21.515	21.377	21.655	3.5527e-15					44	20	5	0	0	0	1.6888e-19	6	5304	105.03	96.133
FSEASLVKELEKR	13	Unmodified	_FSEASLVKELEKR_					0	0	0	2	sp|P06612|TOP1_ECOLI	sp|P06612|TOP1_ECOLI	sp|P06612|TOP1_ECOLI	MULTI-MSMS	Ac-Topo (MSMS_500 thold)_1-45_01_2665	768.93	2	768.425	1534.84	NaN	1.1186	0.00085956	-0.37491	-0.00028809	0.74368	0.00057147	768.425	27.97	0.76458	27.97	27.648	28.412	0					12	5	3	0	0	0	1.7571e-154	2	6167	249.83	236.88
VVGYMVSPLLWKK	13	Oxidation (M)	_VVGYM(ox)VSPLLWKK_		VVGYM(1)VSPLLWKK		VVGYM(78.66)VSPLLWKK	0	0	1	1	sp|P06612|TOP1_ECOLI	sp|P06612|TOP1_ECOLI	sp|P06612|TOP1_ECOLI	MULTI-MSMS	Ac-Topo (MSMS_500 thold)_1-45_01_2665	768.442	2	768.436	1534.86	NaN	2.2014	0.0016916	2.1365	0.0016418	4.3379	0.0033334	768.44	29.428	0.33927	29.428	29.245	29.585	0					11	4	3	0	0	0	1.1482e-12	2	6357	78.655	78.655
EQTQAAVSLLEKAR	14	Unmodified	_EQTQAAVSLLEKAR_					0	0	0	1	sp|P06612|TOP1_ECOLI	sp|P06612|TOP1_ECOLI	sp|P06612|TOP1_ECOLI	MSMS	Ac-Topo (MSMS_500 thold)_1-45_01_2665	772.425	2	772.426	1542.84	NaN	NaN	NaN	NaN	NaN	NaN	NaN	NaN	26.172	1	26.172	25.672	26.672	0								0	0	0	9.4632e-07	1	5933	76.326	62.168
YLADAPQQDPEGNK	14	Unmodified	_YLADAPQQDPEGNK_					0	0	0	0	sp|P06612|TOP1_ECOLI	sp|P06612|TOP1_ECOLI	sp|P06612|TOP1_ECOLI	MULTI-MSMS	Ac-Topo (MSMS_500 thold)_1-45_01_2665	773.363	2	773.363	1544.71	NaN	1.9826	0.0015333	0.90286	0.00069824	2.8855	0.0022315	773.865	19.726	0.25122	19.726	19.609	19.861	0					40	20	3	0	0	0	5.5241e-49	7	4979	167.18	158.45
KYLPESPNQYASK	13	Acetyl (K)	_K(ac)YLPESPNQYASK_	K(1)YLPESPNQYASK		K(33.96)YLPESPNQYASK(-33.96)		1	0	0	1	sp|P06612|TOP1_ECOLI	sp|P06612|TOP1_ECOLI	sp|P06612|TOP1_ECOLI	MSMS	Ac-Topo (MSMS_500 thold)_1-45_01_2665	783.893	2	783.894	1565.77	NaN	NaN	NaN	NaN	NaN	NaN	NaN	NaN	23.566	1	23.566	23.066	24.066	0								0	0	0	0.02307	1	5591	33.961	27.483
FSEASLVKELEKR	13	Acetyl (K)	_FSEASLVKELEK(ac)R_	FSEASLVK(0.094)ELEK(0.906)R		FSEASLVK(-9.86)ELEK(9.86)R		1	0	0	2	sp|P06612|TOP1_ECOLI	sp|P06612|TOP1_ECOLI	sp|P06612|TOP1_ECOLI	MULTI-MSMS	Ac-Topo (MSMS_500 thold)_1-45_01_2665	789.932	2	789.43	1576.85	NaN	2.2033	0.0017394	-2.2038	-0.0017398	-0.00052786	-4.1671e-07	789.429	29.352	0.49336	29.352	29.091	29.585	0					10	7	2	0	0	0	3.0418e-08	3	6347	68.536	45.894
CGTAMDSYLIDPKR	14	Unmodified	_CGTAMDSYLIDPKR_					0	0	0	1	sp|P06612|TOP1_ECOLI	sp|P06612|TOP1_ECOLI	sp|P06612|TOP1_ECOLI	MSMS	Ac-Topo (MSMS_500 thold)_1-45_01_2665	813.883	2	813.884	1625.75	NaN	NaN	NaN	NaN	NaN	NaN	NaN	NaN	26.892	1	26.892	26.392	27.392	0								0	0	0	3.8799e-11	1	6028	99.5	94.683
IKGYDGPIVECEKCGSEMHLK	21	Unmodified	_IKGYDGPIVECEKCGSEMHLK_					0	0	0	2	sp|P06612|TOP1_ECOLI	sp|P06612|TOP1_ECOLI	sp|P06612|TOP1_ECOLI	MSMS	Ac-Topo (MSMS_500 thold)_1-45_01_2665	817.391	3	817.389	2449.14	NaN	NaN	NaN	NaN	NaN	NaN	NaN	NaN	24.218	1	24.218	23.718	24.718	0								0	0	0	0.010678	1	5678	44.729	36.234
CGTAMDSYLIDPKR	14	Oxidation (M)	_CGTAM(ox)DSYLIDPKR_		CGTAM(1)DSYLIDPKR		CGTAM(88.34)DSYLIDPKR	0	0	1	1	sp|P06612|TOP1_ECOLI	sp|P06612|TOP1_ECOLI	sp|P06612|TOP1_ECOLI	MULTI-MSMS	Ac-Topo (MSMS_500 thold)_1-45_01_2665	821.881	2	821.882	1641.75	NaN	1.965	0.001615	1.0729	0.00088178	3.0379	0.0024968	821.883	24.115	0.65222	24.115	23.657	24.309	0					23	7	5	0	0	0	2.731e-13	3	5659	88.338	79.383
IKGYDGPIVECEKCGSEMHLK	21	Oxidation (M)	_IKGYDGPIVECEKCGSEM(ox)HLK_		IKGYDGPIVECEKCGSEM(1)HLK		IKGYDGPIVECEKCGSEM(23.66)HLK	0	0	1	2	sp|P06612|TOP1_ECOLI	sp|P06612|TOP1_ECOLI	sp|P06612|TOP1_ECOLI	MULTI-MSMS	Ac-Topo (MSMS_500 thold)_1-45_01_2665	823.058	3	822.72	2465.14	NaN	2.3437	0.0019282	1.8631	0.0015328	4.2068	0.003461	823.058	22.595	0.28518	22.595	22.477	22.763	0					8	4	2	0	0	0	0.024568	1	5464	23.658	10.6
TDSTNLSQDAVNMVR	15	Unmodified	_TDSTNLSQDAVNMVR_					0	0	0	0	sp|P06612|TOP1_ECOLI	sp|P06612|TOP1_ECOLI	sp|P06612|TOP1_ECOLI	MSMS	Ac-Topo (MSMS_500 thold)_1-45_01_2665	825.895	2	825.891	1649.77	NaN	NaN	NaN	NaN	NaN	NaN	NaN	NaN	26.275	1	26.275	25.775	26.775	0								0	0	0	7.197e-08	1	5946	83.769	68.893
TDSTNLSQDAVNMVR	15	Oxidation (M)	_TDSTNLSQDAVNM(ox)VR_		TDSTNLSQDAVNM(1)VR		TDSTNLSQDAVNM(125.23)VR	0	0	1	0	sp|P06612|TOP1_ECOLI	sp|P06612|TOP1_ECOLI	sp|P06612|TOP1_ECOLI	MULTI-MSMS	Ac-Topo (MSMS_500 thold)_1-45_01_2665	833.888	2	833.889	1665.76	NaN	2.0469	0.0017069	1.0299	0.00085883	3.0768	0.0025657	833.89	22.728	0.52368	22.728	22.431	22.954	0					15	9	2	0	0	0	2.1229e-28	4	5460	125.23	101.85
YMACTNEECKNTR	13	Unmodified	_YMACTNEECKNTR_					0	0	0	1	sp|P06612|TOP1_ECOLI	sp|P06612|TOP1_ECOLI	sp|P06612|TOP1_ECOLI	MULTI-MSMS	Ac-Topo (MSMS_500 thold)_1-45_01_2665	838.845	2	838.845	1675.68	NaN	2.3609	0.0019804	-1.1584	-0.00097175	1.2024	0.0010086	838.844	10.065	0.37508	10.065	9.817	10.192	0					33	19	3	0	0	0	2.5889e-13	7	3059	91.584	91.584
MGVDPWHNWEAHYEVLPGKEK	21	Unmodified	_MGVDPWHNWEAHYEVLPGKEK_					0	0	0	1	sp|P06612|TOP1_ECOLI	sp|P06612|TOP1_ECOLI	sp|P06612|TOP1_ECOLI	MULTI-MSMS	Ac-Topo (MSMS_500 thold)_1-45_01_2665	841.735	3	841.402	2521.18	NaN	1.6031	0.0013489	-2.9381	-0.0024721	-1.3349	-0.0011232	841.734	29.645	0.96942	29.645	29.408	30.377	0					14	8	3	0	0	0	1.0749e-21	1	6390	103.2	95.753
SSVGHIRDLPTSGSAAK	17	Unmodified	_SSVGHIRDLPTSGSAAK_					0	0	0	1	sp|P06612|TOP1_ECOLI	sp|P06612|TOP1_ECOLI	sp|P06612|TOP1_ECOLI	MULTI-MSMS	Ac-Topo (MSMS_500 thold)_1-45_01_2665	841.947	2	841.945	1681.87	NaN	1.2476	0.0010504	-0.18971	-0.00015973	1.0579	0.00089066	841.944	21.199	0.4532	21.199	21.057	21.511	0					90	34	5	0	0	0	3.5928e-49	6	5248	144.88	144.88
YMACTNEECKNTR	13	Oxidation (M)	_YM(ox)ACTNEECKNTR_		YM(1)ACTNEECKNTR		YM(32.61)ACTNEECKNTR	0	0	1	1	sp|P06612|TOP1_ECOLI	sp|P06612|TOP1_ECOLI	sp|P06612|TOP1_ECOLI	MSMS	Ac-Topo (MSMS_500 thold)_1-45_01_2665	846.839	2	846.842	1691.67	NaN	NaN	NaN	NaN	NaN	NaN	NaN	NaN	8.7445	1	8.7445	8.2445	9.2445	0								0	0	0	0.033887	1	2843	32.606	32.606
AKTINKYLGSDYVVK	15	Unmodified	_AKTINKYLGSDYVVK_					0	0	0	2	sp|P06612|TOP1_ECOLI	sp|P06612|TOP1_ECOLI	sp|P06612|TOP1_ECOLI	MSMS	Ac-Topo (MSMS_500 thold)_1-45_01_2665	849.981	2	849.975	1697.94	NaN	NaN	NaN	NaN	NaN	NaN	NaN	NaN	24.401	1	24.401	23.901	24.901	0								0	0	0	4.5414e-08	1	5702	86.028	63.307
SRETRAPLVEELYR	14	Unmodified	_SRETRAPLVEELYR_					0	0	0	2	sp|P06612|TOP1_ECOLI	sp|P06612|TOP1_ECOLI	sp|P06612|TOP1_ECOLI	MULTI-MSMS	Ac-Topo (MSMS_500 thold)_1-45_01_2665	860.461	2	859.963	1717.91	NaN	2.1013	0.0018071	2.3343	0.0020074	4.4356	0.0038145	859.965	27.419	0.46766	27.419	27.262	27.73	0					13	5	3	0	0	0	0.033103	1	6116	13.906	8.8075
TMMMAQR	7	Unmodified	_TMMMAQR_					0	0	0	0	sp|P06612|TOP1_ECOLI	sp|P06612|TOP1_ECOLI	sp|P06612|TOP1_ECOLI	MULTI-MSMS	Ac-Topo (MSMS_500 thold)_1-45_01_2665	868.39	1	868.384	867.376	NaN	2.392	0.0020771	-0.19335	-0.0001679	2.1986	0.0019092	868.383	20.924	0.041943	20.924	20.894	20.936	-3.5527e-15					8	6	2	0	0	0	0.037394	1	5202	3.8532	0.66192
KLHVCGNNPTCDGYEIEEGEFR	22	Unmodified	_KLHVCGNNPTCDGYEIEEGEFR_					0	0	0	1	sp|P06612|TOP1_ECOLI	sp|P06612|TOP1_ECOLI	sp|P06612|TOP1_ECOLI	MULTI-MSMS	Ac-Topo (MSMS_500 thold)_1-45_01_2665	876.066	3	875.388	2623.14	NaN	2.1946	0.0019211	3.3	0.0028888	5.4946	0.0048099	876.059	25.238	0.38774	25.238	25.028	25.416	0					9	5	2	0	0	0	3.1479e-05	1	5818	50.255	42.923
CGTAMDSYLIDPKRK	15	Unmodified	_CGTAMDSYLIDPKRK_					0	0	0	2	sp|P06612|TOP1_ECOLI	sp|P06612|TOP1_ECOLI	sp|P06612|TOP1_ECOLI	MULTI-MSMS	Ac-Topo (MSMS_500 thold)_1-45_01_2665	878.429	2	877.932	1753.85	NaN	2.1058	0.0018488	-2.6975	-0.0023682	-0.59161	-0.00051939	877.931	25.734	0.33572	25.734	25.503	25.839	0					9	6	2	0	0	0	3.2755e-13	3	5871	83.045	65.454
EDKPTTSKPGAPFITSTLQQAASTR	25	Unmodified	_EDKPTTSKPGAPFITSTLQQAASTR_					0	0	0	2	sp|P06612|TOP1_ECOLI	sp|P06612|TOP1_ECOLI	sp|P06612|TOP1_ECOLI	MULTI-MSMS	Ac-Topo (MSMS_500 thold)_1-45_01_2665	878.462	3	878.124	2631.35	NaN	1.8266	0.0016039	-0.76321	-0.00067019	1.0634	0.00093376	878.46	27.97	0.68246	27.97	27.73	28.412	0					7	4	2	0	0	0	1.49e-09	2	6171	60.472	56.668
CGTAMDSYLIDPKRK	15	Oxidation (M)	_CGTAM(ox)DSYLIDPKRK_		CGTAM(1)DSYLIDPKRK		CGTAM(54.78)DSYLIDPKRK	0	0	1	2	sp|P06612|TOP1_ECOLI	sp|P06612|TOP1_ECOLI	sp|P06612|TOP1_ECOLI	MULTI-MSMS	Ac-Topo (MSMS_500 thold)_1-45_01_2665	885.935	2	885.929	1769.84	NaN	2.2484	0.0019919	0.95839	0.00084906	3.2067	0.002841	886.429	22.989	0.45383	22.989	22.763	23.216	0					13	8	2	0	0	0	3.5935e-05	3	5509	54.776	48.52
SSVGHIRDLPTSGSAAKK	18	Unmodified	_SSVGHIRDLPTSGSAAKK_					0	0	0	2	sp|P06612|TOP1_ECOLI	sp|P06612|TOP1_ECOLI	sp|P06612|TOP1_ECOLI	MULTI-MSMS	Ac-Topo (MSMS_500 thold)_1-45_01_2665	906.501	2	905.992	1809.97	NaN	2.0518	0.0018589	-0.27422	-0.00024844	1.7776	0.0016105	906.495	20.401	0.43039	20.401	20.254	20.685	0					22	12	3	0	0	0	5.5735e-05	3	5102	50.222	44.838
LHVCGNNPTCDGYEIEEGEFRIK	23	Unmodified	_LHVCGNNPTCDGYEIEEGEFRIK_					0	0	0	1	sp|P06612|TOP1_ECOLI	sp|P06612|TOP1_ECOLI	sp|P06612|TOP1_ECOLI	MULTI-MSMS	Ac-Topo (MSMS_500 thold)_1-45_01_2665	913.42	3	913.083	2736.23	NaN	2.0253	0.0018493	-0.42631	-0.00038925	1.599	0.00146	913.417	27.2	0.45745	27.2	27.017	27.475	0					14	6	3	0	0	0	6.1606e-06	2	6070	54.672	54.672
SSVGHIRDLPTSGSAAKK	18	Acetyl (K)	_SSVGHIRDLPTSGSAAK(ac)K_	SSVGHIRDLPTSGSAAK(1)K		SSVGHIRDLPTSGSAAK(31.88)K(-31.88)		1	0	0	2	sp|P06612|TOP1_ECOLI	sp|P06612|TOP1_ECOLI	sp|P06612|TOP1_ECOLI	MULTI-MSMS	Ac-Topo (MSMS_500 thold)_1-45_01_2665	926.998	2	926.997	1851.98	NaN	2.2574	0.0020926	-1.3106	-0.0012149	0.94688	0.00087775	926.999	21.603	0.15474	21.603	21.511	21.665	0					12	9	2	0	0	0	0.0052448	2	5323	31.881	31.881
VVFNEITK	8	Unmodified	_VVFNEITK_					0	0	0	0	sp|P06612|TOP1_ECOLI	sp|P06612|TOP1_ECOLI	sp|P06612|TOP1_ECOLI	MULTI-MSMS	Ac-Topo (MSMS_500 thold)_1-45_01_2665	949.536	1	949.535	948.528	NaN	1.2782	0.0012137	0.018088	1.7176e-05	1.2963	0.0012309	949.535	25.118	0.58533	25.118	24.807	25.392	0					19	7	3	0	0	0	8.0235e-63	3	5797	176.75	159.82
GIGRPSTYASIISTIQDR	18	Unmodified	_GIGRPSTYASIISTIQDR_					0	0	0	1	sp|P06612|TOP1_ECOLI	sp|P06612|TOP1_ECOLI	sp|P06612|TOP1_ECOLI	MULTI-MSMS	Ac-Topo (MSMS_500 thold)_1-45_01_2665	969.019	2	968.018	1934.02	NaN	1.6794	0.0016257	1.0117	0.00097932	2.6911	0.002605	968.521	29.447	1.0748	29.447	29.201	30.276	0					27	10	4	0	0	0	0.0041978	3	6352	37.32	32.005
LYQLIWR	7	Unmodified	_LYQLIWR_					0	0	0	0	sp|P06612|TOP1_ECOLI	sp|P06612|TOP1_ECOLI	sp|P06612|TOP1_ECOLI	MULTI-MSMS	Ac-Topo (MSMS_500 thold)_1-45_01_2665	991.578	1	991.572	990.565	NaN	2.074	0.0020565	-0.4842	-0.00048012	1.5898	0.0015764	991.572	31.164	0.15747	31.164	31.057	31.214	0					9	5	2	0	0	0	0.0027513	4	6592	30.718	28.701
GYISDNFGK	9	Unmodified	_GYISDNFGK_					0	0	0	0	sp|P06612|TOP1_ECOLI	sp|P06612|TOP1_ECOLI	sp|P06612|TOP1_ECOLI	MULTI-MSMS	Ac-Topo (MSMS_500 thold)_1-45_01_2665	1000.48	1	1000.47	999.466	NaN	2.012	0.002013	2.6225	0.0026238	4.6346	0.0046368	1000.48	24.507	0.32507	24.507	24.309	24.634	0					9	5	2	0	0	0	1.1799e-12	3	5717	88.921	77.51
ATGWSAFYVDGKWVEGKK	18	Unmodified	_ATGWSAFYVDGKWVEGKK_					0	0	0	2	sp|P06612|TOP1_ECOLI	sp|P06612|TOP1_ECOLI	sp|P06612|TOP1_ECOLI	MULTI-MSMS	Ac-Topo (MSMS_500 thold)_1-45_01_2665	1015.51	2	1015.01	2028.01	NaN	1.8098	0.0018369	-1.6451	-0.0016698	0.16462	0.00016709	1015.51	28.899	0.47899	28.899	28.766	29.245	0					9	8	2	0	0	0	5.5365e-09	2	6295	69.92	46.209
YLADAPQQDPEGNKTMVR	18	Unmodified	_YLADAPQQDPEGNKTMVR_					0	0	0	1	sp|P06612|TOP1_ECOLI	sp|P06612|TOP1_ECOLI	sp|P06612|TOP1_ECOLI	MULTI-MSMS	Ac-Topo (MSMS_500 thold)_1-45_01_2665	1016.99	2	1016.99	2031.97	NaN	1.5133	0.0015391	-0.49685	-0.0005053	1.0165	0.0010338	1017.49	21.958	0.40587	21.958	21.749	22.155	0					12	9	2	0	0	0	3.666e-38	3	5363	129.77	120.9
YLADAPQQDPEGNKTMVR	18	Oxidation (M)	_YLADAPQQDPEGNKTM(ox)VR_		YLADAPQQDPEGNKTM(1)VR		YLADAPQQDPEGNKTM(102.52)VR	0	0	1	1	sp|P06612|TOP1_ECOLI	sp|P06612|TOP1_ECOLI	sp|P06612|TOP1_ECOLI	MULTI-MSMS	Ac-Topo (MSMS_500 thold)_1-45_01_2665	1024.99	2	1024.99	2047.96	NaN	1.5291	0.0015673	-1.4179	-0.0014533	0.11116	0.00011394	1024.99	20.401	0.40692	20.401	20.211	20.618	0					19	11	3	0	0	0	2.1488e-20	2	5112	102.52	97.226
TASTGVFLGCSGYALPPKER	20	Unmodified	_TASTGVFLGCSGYALPPKER_					0	0	0	1	sp|P06612|TOP1_ECOLI	sp|P06612|TOP1_ECOLI	sp|P06612|TOP1_ECOLI	MULTI-MSMS	Ac-Topo (MSMS_500 thold)_1-45_01_2665	1056.53	2	1056.03	2110.05	NaN	1.391	0.001469	-0.1591	-0.00016801	1.2319	0.001301	1056.54	27.419	1.4601	27.419	27.226	28.686	0					62	15	6	0	0	0	1.0184e-39	8	6133	129.38	124.28
LHVCGNNPTCDGYEIEEGEFR	21	Unmodified	_LHVCGNNPTCDGYEIEEGEFR_					0	0	0	0	sp|P06612|TOP1_ECOLI	sp|P06612|TOP1_ECOLI	sp|P06612|TOP1_ECOLI	MSMS	Ac-Topo (MSMS_500 thold)_1-45_01_2665	1248.54	2	1248.53	2495.05	NaN	NaN	NaN	NaN	NaN	NaN	NaN	NaN	26.05	1	26.05	25.55	26.55	0								0	0	0	7.6559e-15	1	5917	92.8	92.8
Peptides Assigned to other proteins
LQDIKSGLRQAK	12	Unmodified	_LQDIKSGLRQAK_					0	0	0	2	CON__REFSEQ:XP_932229	CON__REFSEQ:XP_932229	CON__REFSEQ:XP_932229	MSMS	Ac-Topo (MSMS_500 thold)_1-45_01_2665	452.931	3	452.937	1355.79	NaN	NaN	NaN	NaN	NaN	NaN	NaN	NaN	13.937	1	13.937	13.437	14.437	0								0	0	0	0.037394	1	3792	7.9109	4.5894
DEKEQIKCLNNR	12	Unmodified	_DEKEQIKCLNNR_					0	0	0	2	CON__Q9NSB4	CON__Q9NSB4	CON__Q9NSB4	MULTI-SECPEP	Ac-Topo (MSMS_500 thold)_1-45_01_2665	775.375	2	773.886	1545.76	NaN	2.4996	0.0019344	-6.6551	-0.0051503	-4.1555	-0.0032159	773.879	21.509	0.1758	21.509	21.453	21.629	0					16	9	2	0	0	0	0.036891	1	5308	36.334	21.873
DEKEQIKTLNNK	12	Acetyl (K)	_DEK(ac)EQIKTLNNK_	DEK(0.5)EQIK(0.5)TLNNK		DEK(0)EQIK(0)TLNNK(-25.44)		1	0	0	2	CON__Q9NSB2;CON__Q6ISB0	CON__Q9NSB2	CON__Q9NSB2	MSMS	Ac-Topo (MSMS_500 thold)_1-45_01_2665	751.399	2	751.396	1500.78	NaN	NaN	NaN	NaN	NaN	NaN	NaN	NaN	23.762	1	23.762	23.262	24.262	0								0	0	0	0.034519	1	5620	25.437	6.6915
HVEQENASLESR	12	Unmodified	_HVEQENASLESR_					0	0	0	0	CON__Q92764	CON__Q92764	CON__Q92764	MSMS	Ac-Topo (MSMS_500 thold)_1-45_01_2665	466.9	3	466.892	1397.65	NaN	NaN	NaN	NaN	NaN	NaN	NaN	NaN	9.946	1	9.946	9.446	10.446	0								0	0	0	0.037394	1	3038	5.2942	0.95372
VLSSRVHTVEEKSTK	15	Unmodified	_VLSSRVHTVEEKSTK_					0	0	0	2	CON__Q7Z3Y8	CON__Q7Z3Y8	CON__Q7Z3Y8	MULTI-MSMS	Ac-Topo (MSMS_500 thold)_1-45_01_2665	850.481	2	850.471	1698.93	NaN	2.1886	0.0018613	5.1828	0.0044078	7.3713	0.0062691	850.476	24.34	0.34594	24.34	24.231	24.577	0					7	5	2	0	0	0	0.033335	1	5695	13.2	4.0119
LEQAEKK	7	Acetyl (K)	_LEQAEK(ac)K_	LEQAEK(1)K		LEQAEK(36.19)K(-36.19)		1	0	0	1	CON__Q3SX28	CON__Q3SX28	CON__Q3SX28	MSMS	Ac-Topo (MSMS_500 thold)_1-45_01_2665	444.245	2	444.245	886.476	NaN	NaN	NaN	NaN	NaN	NaN	NaN	NaN	29.27	1	29.27	28.77	29.77	0								0	0	0	0.010072	1	6340	36.185	30.527
VRLDSELRSVR	11	Unmodified	_VRLDSELRSVR_					0	0	0	2	CON__Q32MB2	CON__Q32MB2	CON__Q32MB2	MULTI-MSMS	Ac-Topo (MSMS_500 thold)_1-45_01_2665	443.932	3	443.925	1328.75	NaN	3.3493	0.0014869	11.091	0.0049237	14.441	0.0064105	443.931	23.675	0.28951	23.675	23.597	23.886	0					10	6	2	0	0	0	0.037387	1	5612	3.0421	0
SGSDEVQVKQER	12	Unmodified	_SGSDEVQVKQER_					0	0	0	1	CON__Q2UVX4	CON__Q2UVX4	CON__Q2UVX4	MSMS	Ac-Topo (MSMS_500 thold)_1-45_01_2665	681.332	2	681.336	1360.66	NaN	NaN	NaN	NaN	NaN	NaN	NaN	NaN	26.206	1	26.206	25.706	26.706	0								0	0	0	0.037394	1	5937	15.208	10.512
ADPQCPQPATRR	12	Unmodified	_ADPQCPQPATRR_					0	0	0	1	CON__Q2UVX4	CON__Q2UVX4	CON__Q2UVX4	MULTI-MSMS	Ac-Topo (MSMS_500 thold)_1-45_01_2665	699.3	2	698.841	1395.67	NaN	1.938	0.0013543	-0.95772	-0.0006693	0.98025	0.00068504	698.84	22.321	0.67981	22.321	22.001	22.68	0					50	18	4	0	0	0	0.023444	1	5383	3.887	1.4746
KSDANLTWNSLR	12	Unmodified	_KSDANLTWNSLR_					0	0	0	1	CON__Q2HJF0	CON__Q2HJF0	CON__Q2HJF0	MSMS	Ac-Topo (MSMS_500 thold)_1-45_01_2665	702.866	2	702.865	1403.72	NaN	NaN	NaN	NaN	NaN	NaN	NaN	NaN	7.6892	1	7.6892	7.1892	8.1892	0								0	0	0	0.037394	1	2715	8.5814	5.4686
TYDSYLGDDYVR	12	Unmodified	_TYDSYLGDDYVR_					0	0	0	0	CON__Q29443;CON__Q0IIK2	CON__Q29443	CON__Q29443	MSMS	Ac-Topo (MSMS_500 thold)_1-45_01_2665	733.823	2	733.825	1465.64	NaN	NaN	NaN	NaN	NaN	NaN	NaN	NaN	24.852	1	24.852	24.352	25.352	0								0	0	0	0.037394	1	5760	5.5407	2.9591
TLWHDPR	7	Unmodified	_TLWHDPR_					0	0	0	0	CON__Q28194	CON__Q28194	CON__Q28194	MULTI-MSMS	Ac-Topo (MSMS_500 thold)_1-45_01_2665	462.738	2	462.738	923.461	NaN	3.5652	0.0016498	-5.187	-0.0024002	-1.6218	-0.00075045	462.735	7.2408	0.041917	7.2408	7.2128	7.2547	0					9	6	2	0	0	0	0.027418	1	2655	3.8532	3.8532
WHLSHRPK	8	Unmodified	_WHLSHRPK_					0	0	0	1	CON__Q28194	CON__Q28194	CON__Q28194	MULTI-MSMS	Ac-Topo (MSMS_500 thold)_1-45_01_2665	530.806	2	530.794	1059.57	NaN	3.0076	0.0015964	2.6005	0.0013803	5.608	0.0029767	530.792	18.905	0.060792	18.905	18.877	18.937	0					8	5	2	0	0	0	0.0068577	1	4814	33.738	22.227
NFLICDGTDNWK	12	Unmodified	_NFLICDGTDNWK_					0	0	0	0	CON__Q28065	CON__Q28065	CON__Q28065	MSMS	Ac-Topo (MSMS_500 thold)_1-45_01_2665	494.889	3	494.894	1481.66	NaN	NaN	NaN	NaN	NaN	NaN	NaN	NaN	6.1679	1	6.1679	5.6679	6.6679	0								0	0	0	0.037394	1	2402	6.1477	0.30242
ERGHMLENHVER	12	Unmodified	_ERGHMLENHVER_					0	0	0	1	CON__Q0VCM5	CON__Q0VCM5	CON__Q0VCM5	MSMS	Ac-Topo (MSMS_500 thold)_1-45_01_2665	753.864	2	753.865	1505.72	NaN	NaN	NaN	NaN	NaN	NaN	NaN	NaN	26.058	1	26.058	25.558	26.558	0								0	0	0	0.037394	1	5918	7.8871	1.451
DLNMDCIIAEIKAQYDDVASR	21	Unmodified	_DLNMDCIIAEIKAQYDDVASR_					0	0	0	1	CON__P78386	CON__P78386	CON__P78386	MULTI-MSMS	Ac-Topo (MSMS_500 thold)_1-45_01_2665	814.902	3	814.054	2439.14	NaN	2.0314	0.0016536	-1.8791	-0.0015297	0.15221	0.00012391	814.387	26.879	0.49847	26.879	26.654	27.152	-3.5527e-15					14	9	2	0	0	0	0.036219	1	6039	7.712	3.55
GEREDLIAYLKK	12	Unmodified	_GEREDLIAYLKK_					0	0	0	2	CON__P62894	CON__P62894	CON__P62894	MSMS	Ac-Topo (MSMS_500 thold)_1-45_01_2665	717.904	2	717.901	1433.79	NaN	NaN	NaN	NaN	NaN	NaN	NaN	NaN	32.418	1	32.418	31.918	32.918	0								0	0	0	0.037394	1	6784	4.9406	2.6686
KAALEKSLEDTK	12	Unmodified	_KAALEKSLEDTK_					0	0	0	2	CON__P35527	CON__P35527	CON__P35527	MSMS	Ac-Topo (MSMS_500 thold)_1-45_01_2665	444.922	3	444.917	1331.73	NaN	NaN	NaN	NaN	NaN	NaN	NaN	NaN	12.978	1	12.978	12.478	13.478	0								0	0	0	0.037394	1	3607	9.1944	1.3287
VGDRVNLGTFPK	12	Unmodified	_VGDRVNLGTFPK_					0	0	0	1	CON__P21578	CON__P21578	CON__P21578	MSMS	Ac-Topo (MSMS_500 thold)_1-45_01_2665	434.913	3	434.91	1301.71	NaN	NaN	NaN	NaN	NaN	NaN	NaN	NaN	5.651	1	5.651	5.151	6.151	0								0	0	0	0.037394	1	2271	5.3156	2.0927
VGDRVNLGTFPK	12	Unmodified	_VGDRVNLGTFPK_					0	0	0	1	CON__P21578	CON__P21578	CON__P21578	MSMS	Ac-Topo (MSMS_500 thold)_1-45_01_2665	434.918	3	434.91	1301.71	NaN	NaN	NaN	NaN	NaN	NaN	NaN	NaN	11.59	1	11.59	11.09	12.09	0								0	0	0	0.037394	1	3349	3.7166	0.58828
MLREYQELMSVK	12	Unmodified	_MLREYQELMSVK_					0	0	0	1	CON__P19013	CON__P19013	CON__P19013	MSMS	Ac-Topo (MSMS_500 thold)_1-45_01_2665	763.883	2	763.889	1525.76	NaN	NaN	NaN	NaN	NaN	NaN	NaN	NaN	31.361	1	31.361	30.861	31.861	0								0	0	0	0.037394	1	6624	10.758	0.14762
PGVLPELMGCKN	12	Unmodified	_PGVLPELMGCKN_					0	0	0	1	CON__P13717	CON__P13717	CON__P13717	MSMS	Ac-Topo (MSMS_500 thold)_1-45_01_2665	438.894	3	438.89	1313.65	NaN	NaN	NaN	NaN	NaN	NaN	NaN	NaN	10.073	1	10.073	9.5731	10.573	0								0	0	0	0.037394	1	3056	7.9109	1.4697
DAYSKRAELETALQK	15	Unmodified	_DAYSKRAELETALQK_					0	0	0	2	CON__P07744	CON__P07744	CON__P07744	MULTI-MSMS	Ac-Topo (MSMS_500 thold)_1-45_01_2665	861.955	2	861.955	1721.89	NaN	2.2839	0.0019686	1.4342	0.0012362	3.7181	0.0032048	861.955	24.34	0.42802	24.34	24.149	24.577	0					9	6	2	0	0	0	0.027716	1	5699	16.533	11.355
MNYCRNPDGEPR	12	Unmodified	_MNYCRNPDGEPR_					0	0	0	1	CON__P06868	CON__P06868	CON__P06868	MSMS	Ac-Topo (MSMS_500 thold)_1-45_01_2665	754.821	2	754.822	1507.63	NaN	NaN	NaN	NaN	NaN	NaN	NaN	NaN	25.339	1	25.339	24.839	25.839	0								0	0	0	0.037394	1	5823	1.7302	1.7302
LVDLEEALQKAK	12	Unmodified	_LVDLEEALQKAK_					0	0	0	1	CON__O95678	CON__O95678	CON__O95678	MSMS	Ac-Topo (MSMS_500 thold)_1-45_01_2665	452.924	3	452.929	1355.77	NaN	NaN	NaN	NaN	NaN	NaN	NaN	NaN	20.179	1	20.179	19.679	20.679	0								0	0	0	0.037394	1	5075	7.13	0.68877
LVDLEEALQK	10	Unmodified	_LVDLEEALQK_					0	0	0	0	CON__O95678	CON__O95678	CON__O95678	MULTI-MSMS	Ac-Topo (MSMS_500 thold)_1-45_01_2665	580.328	2	579.324	1156.63	NaN	2.7974	0.0016206	-3.3781	-0.001957	-0.58076	-0.00033645	579.322	11.437	0.21929	11.437	11.292	11.511	0					40	17	3	0	0	0	0.023267	1	3317	27.13	13.752
ETMQFLNDRLANYLEK	16	Unmodified	_ETMQFLNDRLANYLEK_					0	0	0	1	CON__O76015;CON__O76013	CON__O76015	CON__O76015	MULTI-MSMS	Ac-Topo (MSMS_500 thold)_1-45_01_2665	662.659	3	662.331	1983.97	NaN	2.5776	0.0017072	-1.1683	-0.00077381	1.4093	0.0009334	662.33	19.491	0.24807	19.491	19.336	19.584	0					24	13	3	0	0	0	0.018743	1	4932	7.9138	4.6152
KYLQYSSSCNGK	12	Unmodified	_KYLQYSSSCNGK_					0	0	0	1	CON__ENSEMBL:ENSBTAP00000037665	CON__ENSEMBL:ENSBTAP00000037665	CON__ENSEMBL:ENSBTAP00000037665	MSMS	Ac-Topo (MSMS_500 thold)_1-45_01_2665	478.894	3	478.894	1433.66	NaN	NaN	NaN	NaN	NaN	NaN	NaN	NaN	16.03	1	16.03	15.53	16.53	0								0	0	0	0.037394	1	4219	1.7006	0.23244
IGGSYKK	7	Unmodified	_IGGSYKK_					0	0	0	1	CON__ENSEMBL:ENSBTAP00000031900	CON__ENSEMBL:ENSBTAP00000031900	CON__ENSEMBL:ENSBTAP00000031900	MULTI-MSMS	Ac-Topo (MSMS_500 thold)_1-45_01_2665	752.428	1	752.43	751.423	NaN	2.4602	0.0018511	0.33747	0.00025393	2.7977	0.0021051	752.428	32.71	0.23693	32.71	32.641	32.878	7.1054e-15					17	12	2	0	0	0	0.034357	1	6840	5.6589	5.6589
NTMAACDPRRGR	12	Unmodified	_NTMAACDPRRGR_					0	0	0	2	CON__ENSEMBL:ENSBTAP00000025008	CON__ENSEMBL:ENSBTAP00000025008	CON__ENSEMBL:ENSBTAP00000025008	MSMS	Ac-Topo (MSMS_500 thold)_1-45_01_2665	468.892	3	468.891	1403.65	NaN	NaN	NaN	NaN	NaN	NaN	NaN	NaN	10.309	1	10.309	9.8092	10.809	0								0	0	0	0.037394	1	3105	7.1681	0.43935
NTMAACDPRRGR	12	Unmodified	_NTMAACDPRRGR_					0	0	0	2	CON__ENSEMBL:ENSBTAP00000025008	CON__ENSEMBL:ENSBTAP00000025008	CON__ENSEMBL:ENSBTAP00000025008	MSMS	Ac-Topo (MSMS_500 thold)_1-45_01_2665	468.89	3	468.891	1403.65	NaN	NaN	NaN	NaN	NaN	NaN	NaN	NaN	10.779	1	10.779	10.279	11.279	0								0	0	0	0.037394	1	3186	3.7166	3.7166
NTMAACDPRRGR	12	Unmodified	_NTMAACDPRRGR_					0	0	0	2	CON__ENSEMBL:ENSBTAP00000025008	CON__ENSEMBL:ENSBTAP00000025008	CON__ENSEMBL:ENSBTAP00000025008	MSMS	Ac-Topo (MSMS_500 thold)_1-45_01_2665	468.899	3	468.891	1403.65	NaN	NaN	NaN	NaN	NaN	NaN	NaN	NaN	18.296	1	18.296	17.796	18.796	0								0	0	0	0.037394	1	4684	3.0376	3.0376
NTMAACDPRRGR	12	Unmodified	_NTMAACDPRRGR_					0	0	0	2	CON__ENSEMBL:ENSBTAP00000025008	CON__ENSEMBL:ENSBTAP00000025008	CON__ENSEMBL:ENSBTAP00000025008	MSMS	Ac-Topo (MSMS_500 thold)_1-45_01_2665	468.896	3	468.891	1403.65	NaN	NaN	NaN	NaN	NaN	NaN	NaN	NaN	19.949	1	19.949	19.449	20.449	0								0	0	0	0.037394	1	5016	7.5443	4.8479
NTMAACDPRRGR	12	Unmodified	_NTMAACDPRRGR_					0	0	0	2	CON__ENSEMBL:ENSBTAP00000025008	CON__ENSEMBL:ENSBTAP00000025008	CON__ENSEMBL:ENSBTAP00000025008	MSMS	Ac-Topo (MSMS_500 thold)_1-45_01_2665	702.388	2	702.833	1403.65	NaN	NaN	NaN	NaN	NaN	NaN	NaN	NaN	15.94	1	15.94	15.44	16.44	0								0	0	0	0.037394	1	4202	7.8045	7.8045
DTDVRATSPEVR	12	Unmodified	_DTDVRATSPEVR_					0	0	0	1	CON__ENSEMBL:ENSBTAP00000016285	CON__ENSEMBL:ENSBTAP00000016285	CON__ENSEMBL:ENSBTAP00000016285	MSMS	Ac-Topo (MSMS_500 thold)_1-45_01_2665	673.34	2	673.339	1344.66	NaN	NaN	NaN	NaN	NaN	NaN	NaN	NaN	12.285	1	12.285	11.785	12.785	0								0	0	0	0.037394	1	3481	3.887	1.1544
ELERQRQLEWER	12	Unmodified	_ELERQRQLEWER_					0	0	0	2	CON__ENSEMBL:ENSBTAP00000001528	CON__ENSEMBL:ENSBTAP00000001528	CON__ENSEMBL:ENSBTAP00000001528	MSMS	Ac-Topo (MSMS_500 thold)_1-45_01_2665	836.431	2	836.432	1670.85	NaN	NaN	NaN	NaN	NaN	NaN	NaN	NaN	34.353	1	34.353	33.853	34.853	0								0	0	0	0.037394	1	7349	10.523	2.6125
ELERQRQLEWER	12	Unmodified	_ELERQRQLEWER_					0	0	0	2	CON__ENSEMBL:ENSBTAP00000001528	CON__ENSEMBL:ENSBTAP00000001528	CON__ENSEMBL:ENSBTAP00000001528	MSMS	Ac-Topo (MSMS_500 thold)_1-45_01_2665	836.195	2	836.432	1670.85	NaN	NaN	NaN	NaN	NaN	NaN	NaN	NaN	34.531	1	34.531	34.031	35.031	0								0	0	0	0.037394	1	7391	6.6893	2.8024
MaxQuant Reported Protein Groups
Protein IDs	Majority protein IDs	Peptide counts (all)	Peptide counts (razor+unique)	Peptide counts (unique)	Fasta headers	Number of proteins	Peptides	Razor + unique peptides	Unique peptides	Sequence coverage [%]	Unique + razor sequence coverage [%]	Unique sequence coverage [%]	Mol. weight [kDa]	Sequence length	Sequence lengths	Q-value	Score	Intensity	MS/MS count	Only identified by site	Reverse	Potential contaminant	id	Peptide IDs	Peptide is razor	Mod. peptide IDs	Evidence IDs	MS/MS IDs	Best MS/MS	Acetyl (K) site IDs	Oxidation (M) site IDs	Acetyl (K) site positions	Oxidation (M) site positions
sp|P06612|TOP1_ECOLI	sp|P06612|TOP1_ECOLI	60	60	60		1	60	60	60	58.5	58.5	58.5	97.349	865	865	0	323.31	2590000	215				28	1;2;3;4;5;6;10;12;13;15;17;18;21;22;23;24;25;26;28;29;30;31;34;35;37;38;39;41;44;45;46;50;51;52;53;59;60;61;62;64;65;66;67;68;69;70;72;76;78;79;80;81;82;84;85;86;87;88;89;90	True;True;True;True;True;True;True;True;True;True;True;True;True;True;True;True;True;True;True;True;True;True;True;True;True;True;True;True;True;True;True;True;True;True;True;True;True;True;True;True;True;True;True;True;True;True;True;True;True;True;True;True;True;True;True;True;True;True;True;True	1;2;3;4;5;6;7;8;9;10;14;16;17;19;21;22;25;26;27;28;29;30;31;33;34;35;36;37;40;41;42;44;45;46;48;49;52;53;54;58;59;60;61;67;68;69;70;71;73;74;75;76;77;78;79;80;81;83;87;89;90;91;92;93;94;96;97;98;99;100;101;102;103;104	1;2;3;4;5;6;7;8;9;10;11;12;16;18;19;21;24;25;28;29;30;31;32;33;34;35;37;38;39;40;41;44;45;46;48;49;50;52;53;56;57;58;62;63;64;65;75;76;77;78;79;80;82;83;84;85;86;87;88;89;90;91;93;98;100;101;102;103;104;105;107;108;109;110;111;112;113;114;115;116;117	1;2;3;4;5;6;7;8;9;10;11;12;13;14;15;16;17;18;19;20;21;22;23;24;25;26;27;31;32;33;35;36;37;38;39;40;41;42;43;44;45;46;47;49;50;53;54;55;58;59;60;61;62;63;64;65;66;67;68;70;71;72;73;74;75;76;77;78;79;82;83;84;85;87;88;89;91;92;93;94;95;96;97;100;101;102;103;104;108;109;110;111;112;113;114;115;125;126;127;128;129;130;131;132;133;134;136;137;138;139;140;141;142;143;144;145;146;147;148;149;150;151;152…	1;4;12;14;18;25;31;37;42;50;54;55;58;59;60;61;62;68;70;73;75;78;83;85;87;88;89;93;100;102;103;108;110;114;115;125;129;131;134;136;138;144;149;163;167;172;174;188;194;196;200;203;211;214;221;227;237;244;249;250	3;4;5;6	0;1;2;3;4;5;6;7	13;45;346;488	178;320;334;403;669;718;729;828
CON__Q28194	CON__Q28194	2	2	2		1	2	2	2	1.3	1.3	1.3	129.39	1170	1170	0	0.8604	8595.1	2			+	18	71;83	True;True	82;95	92;106	173;212	173;212
CON__Q3SX28	CON__Q3SX28	1	1	1		1	1	1	1	2.5	2.5	2.5	33.012	284	284	0	0.56417	0	1			+	22	43	TRUE	51	55	99	99	0		76
CON__O76015;CON__O76013	CON__O76015;CON__O76013	1;1	1;1	1;1	;	2	1	1	1	3.5	3.5	3.5	50.49	456	456;467	0	0.29448	7194.7	1			+	5	20	TRUE	24	27	57	57
CON__O95678	CON__O95678	2	2	2		1	2	2	2	2.2	2.2	2.2	59.504	551	551	0	0.19507	10499	2			+	6	48;49	True;True	56;57	60;61	106;107	106;107
CON__Q2UVX4	CON__Q2UVX4	2	2	2		1	2	2	2	1.4	1.4	1.4	187.37	1662	1662	0	0.19177	36516	2			+	20	0;63	True;True	0;72	0;81	0;135	0;135
CON__P07744	CON__P07744	1	1	1		1	1	1	1	2.9	2.9	2.9	56.283	525	525	0	0.12457	5338.9	1			+	8	7	TRUE	11	13	28	28
CON__Q7Z3Y8	CON__Q7Z3Y8	1	1	1		1	1	1	1	3.3	3.3	3.3	49.823	459	459	0	0.044406	10515	1			+	24	75	TRUE	86	97	178	178
CON__ENSEMBL:ENSBTAP00000031900	CON__ENSEMBL:ENSBTAP00000031900	1	1	1		1	1	1	1	0.7	0.7	0.7	121.45	1064	1064	0	0.031287	1964.8	1			+	3	33	TRUE	39	43	81	81
CON__Q9NSB2;CON__Q6ISB0	CON__Q9NSB2;CON__Q6ISB0	1;1	1;1	1;1	;	2	1	1	1	2	2	2	64.895	600	600;600	0	0.029241	0	1			+	23	9	TRUE	13	15	30	30	1;2		166;170
CON__P78386	CON__P78386	1	1	1		1	1	1	1	4.1	4.1	4.1	55.802	507	507	0	0.0083675	18848	1			+	14	11	TRUE	15	17	34	34
CON__Q9NSB4	CON__Q9NSB4	1	1	1		1	1	1	1	2.3	2.3	2.3	56.682	513	513	0	0.00037784	3089.9	0			+	26	8	TRUE	12	14	29	29
CON__Q32MB2	CON__Q32MB2	1	1	1		1	1	1	1	2	2	2	58.923	540	540	0	-0.0054143	5176.6	1			+	21	77	TRUE	88	99	191	191
CON__Q29443;CON__Q0IIK2	CON__Q29443;CON__Q0IIK2	1;1	1;1	1;1	;	2	1	1	1	1.8	1.8	1.8	75.829	685	685;704	0	-0.0055012	0	1			+	15	73	TRUE	84	94	175	175
CON__ENSEMBL:ENSBTAP00000001528	CON__ENSEMBL:ENSBTAP00000001528	1	1	1		1	1	1	1	1	1	1	137.98	1222	1222	0	-0.0055012	0	2			+	0	16	TRUE	20	22;23	51;52	51
CON__ENSEMBL:ENSBTAP00000016285	CON__ENSEMBL:ENSBTAP00000016285	1	1	1		1	1	1	1	2	2	2	63.485	591	591	0	-0.0055012	0	1			+	1	14	TRUE	18	20	48	48
CON__ENSEMBL:ENSBTAP00000025008	CON__ENSEMBL:ENSBTAP00000025008	1	1	1		1	1	1	1	2.2	2.2	2.2	59.299	536	536	0	-0.0055012	0	5			+	2	57	TRUE	65	69;70;71;72;73	119;120;121;122;123	120
CON__ENSEMBL:ENSBTAP00000037665	CON__ENSEMBL:ENSBTAP00000037665	1	1	1		1	1	1	1	2.1	2.1	2.1	65.19	578	578	0	-0.0055012	0	1			+	4	42	TRUE	50	54	98	98
CON__P06868	CON__P06868	1	1	1		1	1	1	1	1.5	1.5	1.5	91.215	812	812	0	-0.0055012	0	1			+	7	55	TRUE	63	67	117	117
CON__P13717	CON__P13717	1	1	1		1	1	1	1	4.5	4.5	4.5	28.944	266	266	0	-0.0055012	0	1			+	9	58	TRUE	66	74	124	124
CON__P19013	CON__P19013	1	1	1		1	1	1	1	2	2	2	63.91	594	594	0	-0.0055012	0	1			+	10	54	TRUE	62	66	116	116
CON__P21578	CON__P21578	1	1	1		1	1	1	1	6.2	6.2	6.2	22.236	194	194	0	-0.0055012	0	2			+	11	74	TRUE	85	95;96	176;177	176
CON__P35527	CON__P35527	1	1	1		1	1	1	1	1.9	1.9	1.9	62.129	623	623	0	-0.0055012	0	1			+	12	36	TRUE	43	47	86	86
CON__P62894	CON__P62894	1	1	1		1	1	1	1	11.4	11.4	11.4	11.703	105	105	0	-0.0055012	0	1			+	13	27	TRUE	32	36	69	69
CON__Q0VCM5	CON__Q0VCM5	1	1	1		1	1	1	1	1.3	1.3	1.3	101.24	906	906	0	-0.0055012	0	1			+	16	19	TRUE	23	26	56	56
CON__Q28065	CON__Q28065	1	1	1		1	1	1	1	2	2	2	68.886	610	610	0	-0.0055012	0	1			+	17	56	TRUE	64	68	118	118
CON__Q2HJF0	CON__Q2HJF0	1	1	1		1	1	1	1	1.9	1.9	1.9	69.182	622	622	0	-0.0055012	0	1			+	19	40	TRUE	47	51	90	90
CON__Q92764	CON__Q92764	1	1	1		1	1	1	1	2.8	2.8	2.8	47.596	425	425	0	-0.0055012	0	1			+	25	32	TRUE	38	42	80	80
CON__REFSEQ:XP_932229	CON__REFSEQ:XP_932229	1	1	1		1	1	1	1	3.5	3.5	3.5	36.415	345	345	0	-0.0055012	0	1			+	27	47	TRUE	55	59	105	105
[truncated: 13 more columns]

## Sheet: S2B - Non-Ac Topo I Evidence
Table S2B: MaxQuant Raw Data Evidence Table for Non-Acetylated Topoisomerase peptides. Table S2B shows the unmodified peptides and no acetylated peptides. Also included are the protein groups reported by MaxQuant showing the identification score and % sequence coverage. Topoisomerase I is highlighted in green for clarity purposes. Table S2B also shows peptides containing oxidized methionines.
Sequence	Length	Modifications	Modified sequence	Acetyl (K) Probabilities	Oxidation (M) Probabilities	Acetyl (K) Score Diffs	Oxidation (M) Score Diffs	Acetyl (K)	Acetyl (Protein N-term)	Oxidation (M)	Missed cleavages	Proteins	Leading proteins	Leading razor protein	Type	Raw file	MS/MS m/z	Charge	m/z	Mass	Resolution	Uncalibrated - Calibrated m/z [ppm]	Uncalibrated - Calibrated m/z [Da]	Mass error [ppm]	Mass error [Da]	Uncalibrated mass error [ppm]	Uncalibrated mass error [Da]	Max intensity m/z 0	Retention time	Retention length	Calibrated retention time	Calibrated retention time start	Calibrated retention time finish	Retention time calibration	Match time difference	Match m/z difference	Match q-value	Match score	Number of data points	Number of scans	Number of isotopic peaks	PIF	Fraction of total spectrum	Base peak fraction	PEP	MS/MS count	MS/MS scan number	Score	Delta score
VMPALRK	7	Unmodified	_VMPALRK_					0	0	0	1	sp|P06612|TOP1_ECOLI	sp|P06612|TOP1_ECOLI	sp|P06612|TOP1_ECOLI	MSMS	Topo (MSMS_500 thold)_1-44_01_2664	407.755	2	407.752	813.489	NaN	NaN	NaN	NaN	NaN	NaN	NaN	NaN	20.513	1	20.513	20.013	21.013	0								0	0	0	0.018903	1	5273	42.773	42.773
SSVGHIRDLPTSGSAAKK	18	Unmodified	_SSVGHIRDLPTSGSAAKK_					0	0	0	2	sp|P06612|TOP1_ECOLI	sp|P06612|TOP1_ECOLI	sp|P06612|TOP1_ECOLI	MULTI-MSMS	Topo (MSMS_500 thold)_1-44_01_2664	604.332	3	604.331	1809.97	NaN	1.2287	0.00074254	-0.17165	-0.00010373	1.0571	0.00063881	604.33	20.39	0.45898	20.39	20.282	20.741	0					36	19	3	0	0	0	0.0013832	5	5256	74.147	66.073
VVSELKQLAEK	11	Unmodified	_VVSELKQLAEK_					0	0	0	1	sp|P06612|TOP1_ECOLI	sp|P06612|TOP1_ECOLI	sp|P06612|TOP1_ECOLI	MULTI-MSMS	Topo (MSMS_500 thold)_1-44_01_2664	622.367	2	622.366	1242.72	NaN	8.2116	0.0051106	-6.4757	-0.0040302	1.7359	0.0010804	622.362	24.317	0.46062	24.317	24.091	24.552	-3.55e-15					17	9	3	0	0	0	0.01841	3	5876	18.745	14.277
GYDGPIVECEK	11	Unmodified	_GYDGPIVECEK_					0	0	0	0	sp|P06612|TOP1_ECOLI	sp|P06612|TOP1_ECOLI	sp|P06612|TOP1_ECOLI	MULTI-MSMS	Topo (MSMS_500 thold)_1-44_01_2664	633.79	2	633.787	1265.56	NaN	6.7179	0.0042577	-0.19487	-0.00012351	6.523	0.0041342	633.786	22.833	0.35727	22.833	22.651	23.008	0					11	8	2	0	0	0	2.39e-09	2	5675	61.593	47.9
GYDGPIVECEK	11	Unmodified	_GYDGPIVECEK_					0	0	0	0	sp|P06612|TOP1_ECOLI	sp|P06612|TOP1_ECOLI	sp|P06612|TOP1_ECOLI	MSMS	Topo (MSMS_500 thold)_1-44_01_2664	633.791	2	633.787	1265.56	NaN	NaN	NaN	NaN	NaN	NaN	NaN	NaN	22.883	1	22.883	22.383	23.383	0								0	0	0	0.0301	1	5681	36.424	26.992
QQYVSSEKDGK	11	Unmodified	_QQYVSSEKDGK_					0	0	0	1	sp|P06612|TOP1_ECOLI	sp|P06612|TOP1_ECOLI	sp|P06612|TOP1_ECOLI	MSMS	Topo (MSMS_500 thold)_1-44_01_2664	634.808	2	634.809	1267.6	NaN	NaN	NaN	NaN	NaN	NaN	NaN	NaN	8.8654	1	8.8654	8.3654	9.3654	0								0	0	0	0.016217	1	2892	44.309	39.697
QQYVSSEKDGK	11	Unmodified	_QQYVSSEKDGK_					0	0	0	1	sp|P06612|TOP1_ECOLI	sp|P06612|TOP1_ECOLI	sp|P06612|TOP1_ECOLI	MSMS	Topo (MSMS_500 thold)_1-44_01_2664	634.806	2	634.809	1267.6	NaN	NaN	NaN	NaN	NaN	NaN	NaN	NaN	8.893	1	8.893	8.393	9.393	0								0	0	0	0.012642	1	2896	47.302	36.993
QFVACQMTPAK	11	Unmodified	_QFVACQMTPAK_					0	0	0	0	sp|P06612|TOP1_ECOLI	sp|P06612|TOP1_ECOLI	sp|P06612|TOP1_ECOLI	MSMS	Topo (MSMS_500 thold)_1-44_01_2664	640.812	2	640.81	1279.61	NaN	NaN	NaN	NaN	NaN	NaN	NaN	NaN	23.382	1	23.382	22.882	23.882	0								0	0	0	0.0039937	1	5749	54.608	47.677
QFVACQMTPAK	11	Oxidation (M)	_QFVACQM(ox)TPAK_		QFVACQM(1)TPAK		QFVACQM(52.73)TPAK	0	0	1	0	sp|P06612|TOP1_ECOLI	sp|P06612|TOP1_ECOLI	sp|P06612|TOP1_ECOLI	MSMS	Topo (MSMS_500 thold)_1-44_01_2664	648.809	2	648.807	1295.6	NaN	NaN	NaN	NaN	NaN	NaN	NaN	NaN	19.759	1	19.759	19.259	20.259	0								0	0	0	0.0062434	1	5139	52.725	51.762
EQTQAAVSLLEK	12	Unmodified	_EQTQAAVSLLEK_					0	0	0	0	sp|P06612|TOP1_ECOLI	sp|P06612|TOP1_ECOLI	sp|P06612|TOP1_ECOLI	MSMS	Topo (MSMS_500 thold)_1-44_01_2664	658.861	2	658.856	1315.7	NaN	NaN	NaN	NaN	NaN	NaN	NaN	NaN	26.308	1	26.308	25.808	26.808	0								0	0	0	0.00050301	1	6149	62.466	46.585
ATGWSAFYVDGKWVEGKK	18	Unmodified	_ATGWSAFYVDGKWVEGKK_					0	0	0	2	sp|P06612|TOP1_ECOLI	sp|P06612|TOP1_ECOLI	sp|P06612|TOP1_ECOLI	MULTI-MSMS	Topo (MSMS_500 thold)_1-44_01_2664	677.345	3	677.011	2028.01	NaN	4.6248	0.003131	-2.9783	-0.0020163	1.6465	0.0011147	677.342	28.94	0.35228	28.94	28.805	29.157	-3.55e-15					17	6	4	0	0	0	0.0059267	3	6514	32.55	20.819
YLADAPQQDPEGNKTMVR	18	Unmodified	_YLADAPQQDPEGNKTMVR_					0	0	0	1	sp|P06612|TOP1_ECOLI	sp|P06612|TOP1_ECOLI	sp|P06612|TOP1_ECOLI	MULTI-MSMS	Topo (MSMS_500 thold)_1-44_01_2664	678.333	3	678.33	2031.97	NaN	1.0085	0.00068411	-1.1891	-0.00080661	-0.18059	-0.0001225	678.662	21.915	0.2873	21.915	21.809	22.096	0					15	10	2	0	0	0	9.83e-09	3	5554	71.601	67.074
YLADAPQQDPEGNKTMVR	18	Oxidation (M)	_YLADAPQQDPEGNKTM(ox)VR_		YLADAPQQDPEGNKTM(1)VR		YLADAPQQDPEGNKTM(103.16)VR	0	0	1	1	sp|P06612|TOP1_ECOLI	sp|P06612|TOP1_ECOLI	sp|P06612|TOP1_ECOLI	MULTI-MSMS	Topo (MSMS_500 thold)_1-44_01_2664	683.996	3	683.662	2047.96	NaN	-0.038272	-2.62e-05	1.4052	0.0009607	1.367	0.00093454	683.997	20.375	0.35387	20.375	20.271	20.625	0					21	10	3	0	0	0	2.9e-28	3	5254	103.16	89.117
YLPESPNQYASK	12	Unmodified	_YLPESPNQYASK_					0	0	0	0	sp|P06612|TOP1_ECOLI	sp|P06612|TOP1_ECOLI	sp|P06612|TOP1_ECOLI	MULTI-MSMS	Topo (MSMS_500 thold)_1-44_01_2664	698.841	2	698.841	1395.67	NaN	1.2575	0.00087879	-0.95336	-0.00066625	0.30413	0.00021254	698.841	22.305	0.55483	22.305	22.096	22.651	0					56	20	4	0	0	0	5.59e-16	10	5597	78.655	65.302
VVGYMVSPLLWK	12	Oxidation (M)	_VVGYM(ox)VSPLLWK_		VVGYM(1)VSPLLWK		VVGYM(42.74)VSPLLWK	0	0	1	0	sp|P06612|TOP1_ECOLI	sp|P06612|TOP1_ECOLI	sp|P06612|TOP1_ECOLI	MULTI-MSMS	Topo (MSMS_500 thold)_1-44_01_2664	704.899	2	704.389	1406.76	NaN	5.6777	0.0039993	-2.8699	-0.0020215	2.8078	0.0019778	704.888	31.746	0.27073	31.746	31.611	31.882	0					27	12	3	0	0	0	0.00059594	1	6913	42.743	34.014
CGTAMDSYLIDPK	13	Unmodified	_CGTAMDSYLIDPK_					0	0	0	0	sp|P06612|TOP1_ECOLI	sp|P06612|TOP1_ECOLI	sp|P06612|TOP1_ECOLI	MULTI-MSMS	Topo (MSMS_500 thold)_1-44_01_2664	735.834	2	735.834	1469.65	NaN	3.2732	0.0024086	-2.8333	-0.0020848	0.43997	0.00032375	735.832	27.842	0.25966	27.842	27.699	27.958	0					8	4	2	0	0	0	1.37e-30	2	6365	105.17	105.17
ETRAPLVEELYR	12	Unmodified	_ETRAPLVEELYR_					0	0	0	1	sp|P06612|TOP1_ECOLI	sp|P06612|TOP1_ECOLI	sp|P06612|TOP1_ECOLI	MULTI-MSMS	Topo (MSMS_500 thold)_1-44_01_2664	738.397	2	738.396	1474.78	NaN	-1.2555	-0.00092702	2.1117	0.0015592	0.85622	0.00063223	738.399	28.392	0.65257	28.392	28.04	28.693	0					26	7	5	0	0	0	1.68e-23	2	6434	95.417	85.985
DGAAGVFLAANTFPK	15	Unmodified	_DGAAGVFLAANTFPK_					0	0	0	0	sp|P06612|TOP1_ECOLI	sp|P06612|TOP1_ECOLI	sp|P06612|TOP1_ECOLI	MULTI-MSMS	Topo (MSMS_500 thold)_1-44_01_2664	739.885	2	739.886	1477.76	NaN	-1.2967	-0.0009594	1.9256	0.0014248	0.62895	0.00046535	739.886	30.294	0.58032	30.294	29.829	30.409	0					36	10	5	0	0	0	1.59e-66	4	6689	146.36	142.11
CGTAMDSYLIDPK	13	Oxidation (M)	_CGTAM(ox)DSYLIDPK_		CGTAM(1)DSYLIDPK		CGTAM(119.45)DSYLIDPK	0	0	1	0	sp|P06612|TOP1_ECOLI	sp|P06612|TOP1_ECOLI	sp|P06612|TOP1_ECOLI	MULTI-MSMS	Topo (MSMS_500 thold)_1-44_01_2664	743.831	2	743.831	1485.65	NaN	2.6036	0.0019366	0.21455	0.00015959	2.8182	0.0020962	743.831	25.199	0.5001	25.199	24.877	25.377	0					11	8	2	0	0	0	3.4e-41	3	6002	119.45	99.242
QAFNKPGELNIDR	13	Unmodified	_QAFNKPGELNIDR_					0	0	0	1	sp|P06612|TOP1_ECOLI	sp|P06612|TOP1_ECOLI	sp|P06612|TOP1_ECOLI	MULTI-MSMS	Topo (MSMS_500 thold)_1-44_01_2664	751.395	2	751.392	1500.77	NaN	1.9508	0.0014658	0.11886	8.93e-05	2.0697	0.0015552	751.391	23.844	0.32748	23.844	23.633	23.961	0					10	6	2	0	0	0	0.00041676	1	5809	44.612	31.208
YDSTTLTVGAGDFR	14	Unmodified	_YDSTTLTVGAGDFR_					0	0	0	0	sp|P06612|TOP1_ECOLI	sp|P06612|TOP1_ECOLI	sp|P06612|TOP1_ECOLI	MSMS	Topo (MSMS_500 thold)_1-44_01_2664	751.866	2	751.86	1501.7	NaN	NaN	NaN	NaN	NaN	NaN	NaN	NaN	26.793	1	26.793	26.293	27.293	0								0	0	0	2.29e-06	1	6216	69.979	64.134
IKGYDGPIVECEK	13	Unmodified	_IKGYDGPIVECEK_					0	0	0	1	sp|P06612|TOP1_ECOLI	sp|P06612|TOP1_ECOLI	sp|P06612|TOP1_ECOLI	MULTI-MSMS	Topo (MSMS_500 thold)_1-44_01_2664	754.377	2	754.377	1506.74	NaN	2.3648	0.0017839	-2.2718	-0.0017138	0.092978	7.01e-05	754.373	23.251	0.44365	23.251	22.911	23.355	0					12	9	3	0	0	0	5.13e-06	2	5722	52.576	43.143
QAFNKPGELNIDRVNAQQAR	20	Unmodified	_QAFNKPGELNIDRVNAQQAR_					0	0	0	2	sp|P06612|TOP1_ECOLI	sp|P06612|TOP1_ECOLI	sp|P06612|TOP1_ECOLI	MULTI-MSMS	Topo (MSMS_500 thold)_1-44_01_2664	757.403	3	757.065	2268.17	NaN	-1.0877	-0.00082342	2.4525	0.0018567	1.3648	0.0010333	757.403	23.741	0.63986	23.741	23.595	24.235	0					32	12	5	0	0	0	1.28e-20	6	5807	92.236	82.484
VVGYMVSPLLWKK	13	Unmodified	_VVGYMVSPLLWKK_					0	0	0	1	sp|P06612|TOP1_ECOLI	sp|P06612|TOP1_ECOLI	sp|P06612|TOP1_ECOLI	MULTI-MSMS	Topo (MSMS_500 thold)_1-44_01_2664	760.94	2	760.439	1518.86	NaN	8.3198	0.0063267	-4.2441	-0.0032274	4.0757	0.0030993	760.936	31.687	0.30016	31.687	31.522	31.822	0					21	12	3	0	0	0	7.2e-06	4	6901	48.44	41.835
KYLPESPNQYASK	13	Unmodified	_KYLPESPNQYASK_					0	0	0	1	sp|P06612|TOP1_ECOLI	sp|P06612|TOP1_ECOLI	sp|P06612|TOP1_ECOLI	MULTI-MSMS	Topo (MSMS_500 thold)_1-44_01_2664	763.387	2	762.888	1523.76	NaN	3.9144	0.0029863	-2.6596	-0.002029	1.2548	0.00095725	762.888	21.52	0.29012	21.52	21.377	21.667	0					29	22	2	0	0	0	1.92e-06	4	5461	57.019	34.267
FSEASLVKELEKR	13	Unmodified	_FSEASLVKELEKR_					0	0	0	2	sp|P06612|TOP1_ECOLI	sp|P06612|TOP1_ECOLI	sp|P06612|TOP1_ECOLI	MSMS	Topo (MSMS_500 thold)_1-44_01_2664	768.424	2	768.425	1534.84	NaN	NaN	NaN	NaN	NaN	NaN	NaN	NaN	27.928	1	27.928	27.428	28.428	0								0	0	0	9.01e-25	1	6374	117.86	109.11
FSEASLVKELEKR	13	Unmodified	_FSEASLVKELEKR_					0	0	0	2	sp|P06612|TOP1_ECOLI	sp|P06612|TOP1_ECOLI	sp|P06612|TOP1_ECOLI	MSMS	Topo (MSMS_500 thold)_1-44_01_2664	768.426	2	768.425	1534.84	NaN	NaN	NaN	NaN	NaN	NaN	NaN	NaN	28.006	1	28.006	27.506	28.506	0								0	0	0	3.98e-103	1	6384	190.66	175.45
VVGYMVSPLLWKK	13	Oxidation (M)	_VVGYM(ox)VSPLLWKK_		VVGYM(1)VSPLLWKK		VVGYM(51.09)VSPLLWKK	0	0	1	1	sp|P06612|TOP1_ECOLI	sp|P06612|TOP1_ECOLI	sp|P06612|TOP1_ECOLI	MULTI-MSMS	Topo (MSMS_500 thold)_1-44_01_2664	768.438	2	768.436	1534.86	NaN	4.0328	0.003099	-0.85971	-0.00066063	3.1731	0.0024383	768.936	29.411	0.33164	29.411	29.301	29.633	-3.55e-15					11	6	2	0	0	0	3.49e-05	2	6572	51.092	51.092
YLADAPQQDPEGNK	14	Unmodified	_YLADAPQQDPEGNK_					0	0	0	0	sp|P06612|TOP1_ECOLI	sp|P06612|TOP1_ECOLI	sp|P06612|TOP1_ECOLI	MULTI-MSMS	Topo (MSMS_500 thold)_1-44_01_2664	773.368	2	773.363	1544.71	NaN	1.407	0.0010881	0.60179	0.0004654	2.0088	0.0015535	773.865	19.717	0.24674	19.717	19.617	19.864	3.55e-15					22	16	2	0	0	0	2.99e-22	5	5131	96.113	92.469
CGTAMDSYLIDPKR	14	Unmodified	_CGTAMDSYLIDPKR_					0	0	0	1	sp|P06612|TOP1_ECOLI	sp|P06612|TOP1_ECOLI	sp|P06612|TOP1_ECOLI	MULTI-MSMS	Topo (MSMS_500 thold)_1-44_01_2664	814.387	2	813.884	1625.75	NaN	2.1035	0.001712	-2.9818	-0.0024268	-0.87828	-0.00071482	814.384	26.854	0.36448	26.854	26.635	27	0					14	11	2	0	0	0	1.17e-21	2	6226	91.937	76.048
CGTAMDSYLIDPKR	14	Oxidation (M)	_CGTAM(ox)DSYLIDPKR_		CGTAM(1)DSYLIDPKR		CGTAM(114.82)DSYLIDPKR	0	0	1	1	sp|P06612|TOP1_ECOLI	sp|P06612|TOP1_ECOLI	sp|P06612|TOP1_ECOLI	MSMS	Topo (MSMS_500 thold)_1-44_01_2664	821.883	2	821.882	1641.75	NaN	NaN	NaN	NaN	NaN	NaN	NaN	NaN	24.086	1	24.086	23.586	24.586	0								0	0	0	4.28e-24	1	5850	114.82	93.424
CGTAMDSYLIDPKR	14	Oxidation (M)	_CGTAM(ox)DSYLIDPKR_		CGTAM(1)DSYLIDPKR		CGTAM(87.67)DSYLIDPKR	0	0	1	1	sp|P06612|TOP1_ECOLI	sp|P06612|TOP1_ECOLI	sp|P06612|TOP1_ECOLI	MSMS	Topo (MSMS_500 thold)_1-44_01_2664	821.88	2	821.882	1641.75	NaN	NaN	NaN	NaN	NaN	NaN	NaN	NaN	24.139	1	24.139	23.639	24.639	0								0	0	0	1.97e-10	1	5857	87.667	76.204
TDSTNLSQDAVNMVR	15	Unmodified	_TDSTNLSQDAVNMVR_					0	0	0	0	sp|P06612|TOP1_ECOLI	sp|P06612|TOP1_ECOLI	sp|P06612|TOP1_ECOLI	MSMS	Topo (MSMS_500 thold)_1-44_01_2664	825.89	2	825.891	1649.77	NaN	NaN	NaN	NaN	NaN	NaN	NaN	NaN	26.214	1	26.214	25.714	26.714	0								0	0	0	2.51e-09	1	6137	80.469	68.603
TDSTNLSQDAVNMVR	15	Oxidation (M)	_TDSTNLSQDAVNM(ox)VR_		TDSTNLSQDAVNM(1)VR		TDSTNLSQDAVNM(68.81)VR	0	0	1	0	sp|P06612|TOP1_ECOLI	sp|P06612|TOP1_ECOLI	sp|P06612|TOP1_ECOLI	MULTI-MSMS	Topo (MSMS_500 thold)_1-44_01_2664	833.891	2	833.889	1665.76	NaN	5.9948	0.004999	-2.7395	-0.0022844	3.2553	0.0027145	833.884	22.725	0.33641	22.725	22.575	22.911	0					12	8	2	0	0	0	2.11e-09	1	5660	68.809	45.204
YMACTNEECKNTR	13	Unmodified	_YMACTNEECKNTR_					0	0	0	1	sp|P06612|TOP1_ECOLI	sp|P06612|TOP1_ECOLI	sp|P06612|TOP1_ECOLI	MSMS	Topo (MSMS_500 thold)_1-44_01_2664	838.847	2	838.845	1675.68	NaN	NaN	NaN	NaN	NaN	NaN	NaN	NaN	10.076	1	10.076	9.576	10.576	0								0	0	0	0.0085468	1	3101	42.21	42.21
SSVGHIRDLPTSGSAAK	17	Unmodified	_SSVGHIRDLPTSGSAAK_					0	0	0	1	sp|P06612|TOP1_ECOLI	sp|P06612|TOP1_ECOLI	sp|P06612|TOP1_ECOLI	MULTI-MSMS	Topo (MSMS_500 thold)_1-44_01_2664	841.944	2	841.945	1681.87	NaN	-1.238	-0.0010423	1.8803	0.0015831	0.64233	0.00054081	841.946	21.196	0.39822	21.196	21.084	21.482	0					67	25	5	0	0	0	7.82e-51	6	5404	123.36	102.06
SSVGHIRDLPTSGSAAK	17	Unmodified	_SSVGHIRDLPTSGSAAK_					0	0	0	1	sp|P06612|TOP1_ECOLI	sp|P06612|TOP1_ECOLI	sp|P06612|TOP1_ECOLI	MSMS	Topo (MSMS_500 thold)_1-44_01_2664	841.93	2	841.945	1681.87	NaN	NaN	NaN	NaN	NaN	NaN	NaN	NaN	21.405	1	21.405	20.905	21.905	0								0	0	0	0.02819	1	5440	27.029	4.831
MGVDPWHNWEAHYEVLPGKEK	21	Oxidation (M)	_M(ox)GVDPWHNWEAHYEVLPGKEK_		M(1)GVDPWHNWEAHYEVLPGKEK		M(109.83)GVDPWHNWEAHYEVLPGKEK	0	0	1	1	sp|P06612|TOP1_ECOLI	sp|P06612|TOP1_ECOLI	sp|P06612|TOP1_ECOLI	MULTI-MSMS	Topo (MSMS_500 thold)_1-44_01_2664	847.401	3	846.734	2537.18	NaN	-0.62093	-0.00052577	1.5058	0.001275	0.88486	0.00074924	847.402	29.041	0.39012	29.041	28.875	29.265	0					14	6	3	0	0	0	1.53e-29	2	6524	109.83	102.73
AKTINKYLGSDYVVK	15	Unmodified	_AKTINKYLGSDYVVK_					0	0	0	2	sp|P06612|TOP1_ECOLI	sp|P06612|TOP1_ECOLI	sp|P06612|TOP1_ECOLI	MULTI-MSMS	Topo (MSMS_500 thold)_1-44_01_2664	849.979	2	849.975	1697.94	NaN	2.6386	0.0022428	-0.83712	-0.00071153	1.8015	0.0015312	850.476	24.386	0.31741	24.386	24.235	24.552	0					10	7	2	0	0	0	9.88e-15	2	5897	83.617	43.7
CGTAMDSYLIDPKRK	15	Unmodified	_CGTAMDSYLIDPKRK_					0	0	0	2	sp|P06612|TOP1_ECOLI	sp|P06612|TOP1_ECOLI	sp|P06612|TOP1_ECOLI	MULTI-MSMS	Topo (MSMS_500 thold)_1-44_01_2664	877.933	2	877.932	1753.85	NaN	8.7168	0.0076527	-5.3427	-0.0046905	3.374	0.0029622	878.429	25.692	0.26748	25.692	25.526	25.793	3.55e-15					17	9	3	0	0	0	3.12e-05	2	6069	49.448	37.283
CGTAMDSYLIDPKRK	15	Unmodified	_CGTAMDSYLIDPKRK_					0	0	0	2	sp|P06612|TOP1_ECOLI	sp|P06612|TOP1_ECOLI	sp|P06612|TOP1_ECOLI	MSMS	Topo (MSMS_500 thold)_1-44_01_2664	877.927	2	877.932	1753.85	NaN	NaN	NaN	NaN	NaN	NaN	NaN	NaN	25.742	1	25.742	25.242	26.242	0								0	0	0	0.00015075	1	6075	54.7	51.848
EDKPTTSKPGAPFITSTLQQAASTR	25	Unmodified	_EDKPTTSKPGAPFITSTLQQAASTR_					0	0	0	2	sp|P06612|TOP1_ECOLI	sp|P06612|TOP1_ECOLI	sp|P06612|TOP1_ECOLI	MULTI-MSMS	Topo (MSMS_500 thold)_1-44_01_2664	878.458	3	878.124	2631.35	NaN	2.9014	0.0025478	-5.8894	-0.0051716	-2.988	-0.0026238	878.454	27.997	0.48908	27.997	27.699	28.188	-3.55e-15					10	7	2	0	0	0	0.0022785	1	6386	33.594	31.154
SSVGHIRDLPTSGSAAKK	18	Unmodified	_SSVGHIRDLPTSGSAAKK_					0	0	0	2	sp|P06612|TOP1_ECOLI	sp|P06612|TOP1_ECOLI	sp|P06612|TOP1_ECOLI	MULTI-MSMS	Topo (MSMS_500 thold)_1-44_01_2664	906.494	2	905.992	1809.97	NaN	2.5099	0.002274	-3.8211	-0.0034619	-1.3112	-0.0011879	905.989	20.351	0.36473	20.351	20.282	20.646	0					12	11	2	0	0	0	0.0042308	2	5251	37.366	29.051
VVFNEITK	8	Unmodified	_VVFNEITK_					0	0	0	0	sp|P06612|TOP1_ECOLI	sp|P06612|TOP1_ECOLI	sp|P06612|TOP1_ECOLI	MULTI-MSMS	Topo (MSMS_500 thold)_1-44_01_2664	949.536	1	949.535	948.528	NaN	-1.0094	-0.00095842	2.5333	0.0024054	1.5239	0.001447	949.538	25.146	0.44728	25.146	24.877	25.324	0					17	7	3	0	0	0	2.63e-69	5	5987	147.36	143.43
GIGRPSTYASIISTIQDR	18	Unmodified	_GIGRPSTYASIISTIQDR_					0	0	0	1	sp|P06612|TOP1_ECOLI	sp|P06612|TOP1_ECOLI	sp|P06612|TOP1_ECOLI	MULTI-MSMS	Topo (MSMS_500 thold)_1-44_01_2664	968.521	2	968.018	1934.02	NaN	2.3465	0.0022714	-2.3484	-0.0022733	-0.0019567	-1.89e-06	968.014	29.507	0.87265	29.507	29.301	30.174	0					18	13	2	0	0	0	0.0016788	2	6585	39.509	20.665
GYISDNFGK	9	Unmodified	_GYISDNFGK_					0	0	0	0	sp|P06612|TOP1_ECOLI	sp|P06612|TOP1_ECOLI	sp|P06612|TOP1_ECOLI	MULTI-MSMS	Topo (MSMS_500 thold)_1-44_01_2664	1000.48	1	1000.47	999.466	NaN	3.6637	0.0036654	2.3659	0.002367	6.0296	0.0060325	1000.48	24.51	0.38513	24.51	24.328	24.713	0					11	9	2	0	0	0	0.0070963	1	5902	32.32	28.004
ATGWSAFYVDGKWVEGKK	18	Unmodified	_ATGWSAFYVDGKWVEGKK_					0	0	0	2	sp|P06612|TOP1_ECOLI	sp|P06612|TOP1_ECOLI	sp|P06612|TOP1_ECOLI	MULTI-MSMS	Topo (MSMS_500 thold)_1-44_01_2664	1015.52	2	1015.01	2028.01	NaN	3.0337	0.0030793	-2.0613	-0.0020922	0.97245	0.00098705	1015.51	28.893	0.28943	28.893	28.798	29.088	0					8	6	2	0	0	0	0.001363	1	6505	44.511	26.71
ATGWSAFYVDGKWVEGKK	18	Unmodified	_ATGWSAFYVDGKWVEGKK_					0	0	0	2	sp|P06612|TOP1_ECOLI	sp|P06612|TOP1_ECOLI	sp|P06612|TOP1_ECOLI	MULTI-MSMS	Topo (MSMS_500 thold)_1-44_01_2664	1015.52	2	1015.01	2028.01	NaN	4.8897	0.0049631	-4.2381	-0.0043017	0.6516	0.00066138	1015.51	29.432	0.39023	29.432	29.333	29.723	0					10	6	2	0	0	0	8.82e-05	2	6573	49.12	31.427
YLADAPQQDPEGNKTMVR	18	Unmodified	_YLADAPQQDPEGNKTMVR_					0	0	0	1	sp|P06612|TOP1_ECOLI	sp|P06612|TOP1_ECOLI	sp|P06612|TOP1_ECOLI	MULTI-MSMS	Topo (MSMS_500 thold)_1-44_01_2664	1017.49	2	1016.99	2031.97	NaN	0.019494	1.98e-05	-2.3308	-0.0023704	-2.3113	-0.0023506	1017.49	21.915	0.2873	21.915	21.809	22.096	0					20	10	3	0	0	0	1.16e-20	5	5544	92.039	77.09
YLADAPQQDPEGNKTMVR	18	Oxidation (M)	_YLADAPQQDPEGNKTM(ox)VR_		YLADAPQQDPEGNKTM(1)VR		YLADAPQQDPEGNKTM(69.34)VR	0	0	1	1	sp|P06612|TOP1_ECOLI	sp|P06612|TOP1_ECOLI	sp|P06612|TOP1_ECOLI	MSMS	Topo (MSMS_500 thold)_1-44_01_2664	1024.99	2	1024.99	2047.96	NaN	NaN	NaN	NaN	NaN	NaN	NaN	NaN	20.471	1	20.471	19.971	20.971	0								0	0	0	1.94e-08	1	5268	69.345	53.402
TASTGVFLGCSGYALPPKER	20	Unmodified	_TASTGVFLGCSGYALPPKER_					0	0	0	1	sp|P06612|TOP1_ECOLI	sp|P06612|TOP1_ECOLI	sp|P06612|TOP1_ECOLI	MULTI-MSMS	Topo (MSMS_500 thold)_1-44_01_2664	1056.03	2	1056.03	2110.05	NaN	-0.28458	-0.00030053	1.7257	0.0018224	1.4411	0.0015218	1056.54	27.481	1.3953	27.481	27.274	28.669	0					53	21	3	0	0	0	4.65e-29	13	6334	105.79	101.54
Peptides Assigned to other proteins
HVEQENASLESR	12	Unmodified	_HVEQENASLESR_					0	0	0	0	CON__Q922U2;CON__Q5XQN5;CON__Q8BGZ7;CON__P50446;CON__P04264	CON__Q922U2	CON__Q922U2	MSMS	Topo (MSMS_500 thold)_1-44_01_2664	434.923	3	434.91	1301.71	NaN	NaN	NaN	NaN	NaN	NaN	NaN	NaN	11.256	1	11.256	10.756	11.756	0								0	0	0	0.031137	1	3176	5.6186	2.1941
SLDLDSIIAEVK	12	Unmodified	_SLDLDSIIAEVK_					0	0	0	1	CON__P21578	CON__P21578	CON__P21578	MSMS	Topo (MSMS_500 thold)_1-44_01_2664	434.908	3	434.91	1301.71	NaN	NaN	NaN	NaN	NaN	NaN	NaN	NaN	14.473	1	14.473	13.973	14.973	0								0	0	0	0.031112	1	3331	5.9489	1.7756
HEISEMNRMIQR	12	Unmodified	_HEISEMNRMIQR_					0	0	0	1	CON__P13717	CON__P13717	CON__P13717	MSMS	Topo (MSMS_500 thold)_1-44_01_2664	438.888	3	438.89	1313.65	NaN	NaN	NaN	NaN	NaN	NaN	NaN	NaN	15.87	1	15.87	15.37	16.37	0								0	0	0	0.030707	1	4454	6.533	6.533
GYRPVNSGNQAKDSTEETIVK	21	Unmodified	_GYRPVNSGNQAKDSTEETIVK_					0	0	0	1	CON__P13717	CON__P13717	CON__P13717	MSMS	Topo (MSMS_500 thold)_1-44_01_2664	438.892	3	438.89	1313.65	NaN	NaN	NaN	NaN	NaN	NaN	NaN	NaN	18.689	1	18.689	18.189	19.189	0					7	4	2	0	0	0	0.015568	1	5825	13.188	3.8104
SKAEAEALYQTKIQELQLAASR	22	Unmodified	_SKAEAEALYQTKIQELQLAASR_					0	0	0	1	CON__P13717	CON__P13717	CON__P13717	MSMS	Topo (MSMS_500 thold)_1-44_01_2664	438.893	3	438.89	1313.65	NaN	NaN	NaN	NaN	NaN	NaN	NaN	NaN	28.754	1	28.754	28.254	29.254	0								0	0	0	0.0035139	1	7593	44.735	37.153
SYSCGLPSLSCR	12	Unmodified	_SYSCGLPSLSCR_					0	0	0	2	CON__Q32MB2	CON__Q32MB2	CON__Q32MB2	MULTI-MSMS	Topo (MSMS_500 thold)_1-44_01_2664	444.253	3	443.925	1328.75	NaN	15.387	0.0068308	-2.8142	-0.0012493	12.573	0.0055815	443.922	23.584	0.16386	23.584	23.504	23.668	-3.55e-15								0	0	0	0.031124	1	2656	5.7199	3.697
SKAETENMYQCK	12	Unmodified	_SKAETENMYQCK_					0	0	0	1	CON__Q32PI4	CON__Q32PI4	CON__Q32PI4	MSMS	Topo (MSMS_500 thold)_1-44_01_2664	460.867	3	460.868	1379.58	NaN	NaN	NaN	NaN	NaN	NaN	NaN	NaN	25.408	1	25.408	24.908	25.908	0								0	0	0	0.031168	1	2549	5.6573	5.6573
EDLAKLLRDYQAMLGAK	17	Unmodified	_EDLAKLLRDYQAMLGAK_					0	0	0	0	CON__Q6NTB9;CON__O76009	CON__Q6NTB9	CON__Q6NTB9	MSMS	Topo (MSMS_500 thold)_1-44_01_2664	462.879	3	462.876	1385.61	NaN	NaN	NaN	NaN	NaN	NaN	NaN	NaN	7.1021	1	7.1021	6.6021	7.6021	0					18	13	2	0	0	0	0.013351	1	6603	29.616	16.203
DFIEKVASYGVK	12	Unmodified	_DFIEKVASYGVK_					0	0	0	0	CON__Q92764	CON__Q92764	CON__Q92764	MSMS	Topo (MSMS_500 thold)_1-44_01_2664	466.894	3	466.892	1397.65	NaN	NaN	NaN	NaN	NaN	NaN	NaN	NaN	10.411	1	10.411	9.9113	10.911	0					10	6	2	0	0	0	0.022663	1	6039	13.091	7.6022
RALLEVYNMMSR	12	Unmodified	_RALLEVYNMMSR_					0	0	0	1	CON__P09870	CON__P09870	CON__P09870	MULTI-MSMS	Topo (MSMS_500 thold)_1-44_01_2664	487.253	2	487.244	972.474	NaN	10.405	0.0050697	3.0276	0.0014752	13.432	0.0065449	487.245	25.146	0.19441	25.146	25.047	25.242	3.55e-15								0	0	0	0.030571	1	6746	6.6595	1.1701
KACDGVNDCVDK	12	Unmodified	_KACDGVNDCVDK_					0	0	0	1	CON__Q6IME9	CON__Q6IME9	CON__Q6IME9	MSMS	Topo (MSMS_500 thold)_1-44_01_2664	496.885	3	496.887	1487.64	NaN	NaN	NaN	NaN	NaN	NaN	NaN	NaN	6.6172	1	6.6172	6.1172	7.1172	0								0	0	0	0.030846	1	6026	4.0719	0.94357
HGDDLKHTK	9	Unmodified	_HGDDLKHTK_					0	0	0	0	CON__P15497	CON__P15497	CON__P15497	MULTI-MSMS	Topo (MSMS_500 thold)_1-44_01_2664	513.805	2	513.801	1025.59	NaN	13.346	0.0068572	-0.16735	-8.6e-05	13.179	0.0067713	513.801	19.352	0.18213	19.352	19.216	19.398	0					13	10	2	0	0	0	0.029916	1	5054	15.151	6.2879
VRLDSELRSVR	11	Unmodified	_VRLDSELRSVR_					0	0	0	1	CON__Q32MB2	CON__Q32MB2	CON__Q32MB2	MULTI-MSMS	Topo (MSMS_500 thold)_1-44_01_2664	525.797	2	525.77	1049.53	NaN	23.662	0.012441	4.5196	0.0023763	28.181	0.014817	525.772	19.308	0.13546	19.308	19.216	19.351	0					27	11	3	0	0	0	0.018552	3	5790	16.137	10.188
VGDRVNLGTFPK	12	Unmodified	_VGDRVNLGTFPK_					0	0	0	1	CON__Q3KUS7	CON__Q3KUS7	CON__Q3KUS7	MULTI-MSMS	Topo (MSMS_500 thold)_1-44_01_2664	678.874	2	678.364	1354.71	NaN	9.6493	0.0065457	-1.0396	-0.00070523	8.6097	0.0058405	678.866	25.529	0.20622	25.529	25.404	25.611	0								0	0	0	0.031168	1	4014	5.6594	1.9861
LSPLAQELR	9	Unmodified	_LSPLAQELR_					0	0	0	1	CON__ENSEMBL:ENSBTAP00000025008	CON__ENSEMBL:ENSBTAP00000025008	CON__ENSEMBL:ENSBTAP00000025008	MULTI-MSMS	Topo (MSMS_500 thold)_1-44_01_2664	678.364	2	678.366	1354.72	NaN	9.6492	0.0065457	-4.5099	-0.0030593	5.1394	0.0034864	678.866	25.529	0.20622	25.529	25.404	25.611	0					29	19	2	0	0	0	0.027198	1	5058	14.667	8.8852
PGVLPELMGCKN	12	Unmodified	_PGVLPELMGCKN_					0	0	0	1	CON__H-INV:HIT000292931;CON__Q6KB66-1;CON__Q9DCV7;CON__Q3KNV1;CON__P08729;CON__P05787;CON__Q6NXH9;CON__P19013	CON__H-INV:HIT000292931	CON__H-INV:HIT000292931	MSMS	Topo (MSMS_500 thold)_1-44_01_2664	703.408	2	703.406	1404.8	NaN	NaN	NaN	NaN	NaN	NaN	NaN	NaN	16.412	1	16.412	15.912	16.912	0								0	0	0	0.03084	1	4317	4.114	0.35097
PGVLPELMGCKN	12	Unmodified	_PGVLPELMGCKN_					0	0	0	1	CON__Q3KUS7	CON__Q3KUS7	CON__Q3KUS7	MSMS	Topo (MSMS_500 thold)_1-44_01_2664	741.876	2	741.881	1481.75	NaN	NaN	NaN	NaN	NaN	NaN	NaN	NaN	30.698	1	30.698	30.198	31.198	0								0	0	0	0.030998	1	4913	2.8941	0.23432
PGVLPELMGCKN	12	Unmodified	_PGVLPELMGCKN_					0	0	0	2	CON__Q7Z3Y9	CON__Q7Z3Y9	CON__Q7Z3Y9	MULTI-MSMS	Topo (MSMS_500 thold)_1-44_01_2664	765.389	3	765.052	2292.13	NaN	1.0625	0.00081287	-0.41769	-0.00031955	0.64481	0.00049331	765.388	23.741	0.33932	23.741	23.687	24.026	0								0	0	0	0.031021	1	6481	8.0703	5.9336
KFIDYCK	7	Unmodified	_KFIDYCK_					0	0	0	1	CON__Q922U2;CON__Q5XQN5;CON__P13647	CON__Q922U2	CON__Q922U2	MSMS	Topo (MSMS_500 thold)_1-44_01_2664	772.374	2	772.377	1542.74	NaN	NaN	NaN	NaN	NaN	NaN	NaN	NaN	16.62	1	16.62	16.12	17.12	0					6	3	2	0	0	0	0.017524	1	5990	31.304	20.836
KVPQVSTPTLVEVSR	15	Unmodified	_KVPQVSTPTLVEVSR_					0	0	0	2	CON__Q7RTS7	CON__Q7RTS7	CON__Q7RTS7	MSMS	Topo (MSMS_500 thold)_1-44_01_2664	816.725	3	816.775	2447.3	NaN	NaN	NaN	NaN	NaN	NaN	NaN	NaN	34.322	1	34.322	33.822	34.822	0								0	0	0	0.019456	1	6121	30.828	26.33
VATVSLPR	8	Unmodified	_VATVSLPR_					0	0	0	1	CON__P02769;CON__P02768-1	CON__P02769	CON__P02769	MSMS	Topo (MSMS_500 thold)_1-44_01_2664	820.476	2	820.473	1638.93	NaN	NaN	NaN	NaN	NaN	NaN	NaN	NaN	26.091	1	26.091	25.591	26.591	0					7	5	2	0	0	0	5.05e-15	1	5821	77.282	28.721
LALDIEIATYRK	12	Unmodified	_LALDIEIATYRK_					0	0	0	0	CON__P00761	CON__P00761	CON__P00761	MULTI-MSMS	Topo (MSMS_500 thold)_1-44_01_2664	842.514	1	842.509	841.502	NaN	3.4698	0.0029233	1.927	0.0016235	5.3968	0.0045468	842.51	23.844	0.40463	23.844	23.687	24.091	0								0	0	0	0.031197	1	4420	10.005	6.902
YLTVACIFRGR	11	Unmodified	_YLTVACIFRGR_					0	0	0	2	CON__Q6IFZ6	CON__Q6IFZ6	CON__Q6IFZ6	MULTI-MSMS	Topo (MSMS_500 thold)_1-44_01_2664	968.512	2	968.022	1934.03	NaN	2.3465	0.0022714	-6.1673	-0.0059701	-3.8209	-0.0036987	968.014	29.507	0.87265	29.507	29.301	30.174	0					10	6	2	0	0	0	0.024443	1	6043	13.378	8.2792
WCPLRPLLLALLLASACRTLGPWGQR	26	Unmodified	_WCPLRPLLLALLLASACRTLGPWGQR_					0	0	0	2	CON__ENSEMBL:ENSBTAP00000018574	CON__ENSEMBL:ENSBTAP00000018574	CON__ENSEMBL:ENSBTAP00000018574	MULTI-SECPEP	Topo (MSMS_500 thold)_1-44_01_2664	1008.56	3	1006.89	3017.66	NaN	3.6869	0.0037124	-2.493	-0.0025102	1.1939	0.0012021	1007.56	29.921	0.50352	29.921	29.829	30.332	0					9	6	2	0	0	0	0.030853	1	6643	11.432	11.432
MaxQuant Reported Protein Groups
Protein IDs	Majority protein IDs	Peptide counts (all)	Peptide counts (razor+unique)	Peptide counts (unique)	Fasta headers	Number of proteins	Peptides	Razor + unique peptides	Unique peptides	Sequence coverage [%]	Unique + razor sequence coverage [%]	Unique sequence coverage [%]	Mol. weight [kDa]	Sequence length	Sequence lengths	Q-value	Score	Intensity	MS/MS count	Only identified by site	Reverse	Potential contaminant	id	Peptide IDs	Peptide is razor	Mod. peptide IDs	Evidence IDs	MS/MS IDs	Best MS/MS	Acetyl (K) site IDs	Oxidation (M) site IDs	Acetyl (K) site positions	Oxidation (M) site positions
sp|P06612|TOP1_ECOLI	sp|P06612|TOP1_ECOLI	34	34	34		1	34	34	34	43.7	43.7	43.7	97.349	865	865	0	323.31	966690	129				19	0;1;2;3;4;6;7;9;10;11;12;13;14;19;23;26;28;29;30;31;36;37;39;40;43;45;46;47;48;50;51;52;53;55	True;True;True;True;True;True;True;True;True;True;True;True;True;True;True;True;True;True;True;True;True;True;True;True;True;True;True;True;True;True;True;True;True;True	0;1;2;3;4;5;6;8;9;11;12;13;14;15;16;21;25;28;30;31;32;33;34;39;40;42;43;44;47;49;50;51;52;53;55;56;57;58;59;61	0;1;2;3;4;5;6;7;8;9;10;12;13;15;16;17;18;19;20;21;22;27;31;34;38;39;40;41;42;43;48;49;50;51;53;54;55;58;60;61;62;63;64;66;67;68;69;70;71;72;74	0;1;2;3;4;5;6;7;8;9;10;11;12;13;14;15;16;17;18;19;21;22;23;24;25;27;28;29;30;31;32;33;34;35;36;37;42;43;47;48;49;50;53;54;58;59;60;61;62;63;64;65;66;67;68;73;74;75;76;77;78;79;80;81;82;83;84;85;86;88;89;90;91;92;93;94;95;96;97;98;99;100;101;102;105;109;110;111;112;113;114;115;116;117;118;119;120;121;122;123;125;126;127;128;129;130;131;132;133;134;135;136;137;138;139;140;141;142;143;144;145;146;14…	1;6;10;15;18;24;25;27;29;31;33;35;37;42;50;54;58;62;66;68;76;81;94;101;105;111;114;117;121;125;129;132;147;154		0;1;2;3;4;5		71;178;334;403;669;828
CON__P00761	CON__P00761	1	1	1		1	1	1	1	3.5	3.5	3.5	24.409	231	231	0	18.296	9700.4	1			+	4	41	TRUE	45	56	103	103
CON__Q32MB2	CON__Q32MB2	2	2	2		1	2	2	2	3.7	3.7	3.7	58.923	540	540	0	11.256	6316.7	4			+	10	17;44	True;True	19;48	25;59	40;106;107;108	40;108
CON__Q3KUS7	CON__Q3KUS7	2	2	2		1	2	2	2	3.2	3.2	3.2	85.411	760	760	0	11.159	4568.2	2			+	12	5;32	True;True	7;35	11;44	20;69	20;69
CON__Q922U2;CON__Q5XQN5;CON__Q8BGZ7;CON__P50446;CON__P13647;CON__P04264	CON__Q922U2;CON__Q5XQN5;CON__Q8BGZ7;CON__P50446;CON__P13647;CON__P04264	2;2;1;1;1;1	2;2;1;1;1;1	2;2;1;1;1;1	;;;;;	6	2	2	2	4.1	4.1	4.1	61.766	580	580;601;551;553;590;644	0	11.02	0	2			+	13	16;35	True;True	18;38	24;47	39;72	39;72
CON__Q7RTS7	CON__Q7RTS7	1	1	1		1	1	1	1	4.2	4.2	4.2	57.865	529	529	0	6.4542	0	1			+	16	33	TRUE	36	45	70	70
CON__Q6IFZ6	CON__Q6IFZ6	1	1	1		1	1	1	1	3	3	3	61.358	572	572	0	5.8745	11988	1			+	14	8	TRUE	10	14	26	26
CON__Q7Z3Y9	CON__Q7Z3Y9	1	1	1		1	1	1	1	4.5	4.5	4.5	51.91	468	468	0	5.8078	20115	1			+	17	15	TRUE	17	23	38	38
CON__P09870	CON__P09870	1	1	1		1	1	1	1	1.3	1.3	1.3	59.733	526	526	0	5.7564	5940.5	1			+	6	21	TRUE	23	29	45	45
CON__P02769;CON__P02768-1	CON__P02769;CON__P02768-1	1;1	1;1	1;1	;	2	1	1	1	2.5	2.5	2.5	69.293	607	607;609	0	5.7109	0	1			+	5	22	TRUE	24	30	46	46
CON__ENSEMBL:ENSBTAP00000025008	CON__ENSEMBL:ENSBTAP00000025008	1	1	1		1	1	1	1	2.1	2.1	2.1	59.299	536	536	0	5.6119	4568.2	1			+	1	54	TRUE	60	73	153	153
CON__P15497	CON__P15497	1	1	1		1	1	1	1	3.4	3.4	3.4	30.276	265	265	0	5.5655	4292.9	1			+	8	25	TRUE	27	33	52	52
CON__P13717	CON__P13717	1	1	1		1	1	1	1	4.5	4.5	4.5	28.944	266	266	0	5.5109	0	3			+	7	27	TRUE	29	35;36;37	55;56;57	55
CON__Q32PI4	CON__Q32PI4	1	1	1		1	1	1	1	1.9	1.9	1.9	68.932	618	618	0	5.5108	0	1			+	11	20	TRUE	22	28	44	44
CON__ENSEMBL:ENSBTAP00000018574	CON__ENSEMBL:ENSBTAP00000018574	1	1	1		1	1	1	1	5.2	5.2	5.2	55.207	496	496	0	5.5107	8109.4	0			+	0	49	TRUE	54	65	124	124
CON__Q6NTB9;CON__O76009	CON__Q6NTB9;CON__O76009	1;1	1;1	1;1	;	2	1	1	1	3	3	3	45.968	404	404;404	0	5.5069	0	1			+	3	38	TRUE	41	52	87	87
CON__Q92764	CON__Q92764	1	1	1		1	1	1	1	2.8	2.8	2.8	47.596	425	425	0	5.5067	0	1			+	18	18	TRUE	20	26	41	41
CON__P21578	CON__P21578	1	1	1		1	1	1	1	6.2	6.2	6.2	22.236	194	194	0	5.5063	0	1			+	9	42	TRUE	46	57	104	104
CON__Q6IME9	CON__Q6IME9	1	1	1		1	1	1	1	2.3	2.3	2.3	56.75	520	520	0	5.5063	0	1			+	15	34	TRUE	37	46	71	71
CON__H-INV:HIT000292931;CON__Q6KB66-1;CON__Q9DCV7;CON__Q3KNV1;CON__P08729;CON__P05787;CON__Q6NXH9;CON__P19013	CON__H-INV:HIT000292931;CON__Q6KB66-1;CON__Q9DCV7;CON__Q3KNV1;CON__P08729;CON__P05787;CON__Q6NXH9;CON__P19013	1;1;1;1;1;1;1;1	1;1;1;1;1;1;1;1	1;1;1;1;1;1;1;1	;;;;;;;	8	1	1	1	2.7	2.7	2.7	49.448	443	443;452;457;469;469;483;539;594	0	5.5059	0	1			+	2	24	TRUE	26	32	51	51
[truncated: 13 more columns]
